# Supplementary material
Source: PubMed Central journal article supplement (PMC6295914)
Supplement: NIHMS999608-supplement-Appendix.pdf [file NIHMS999608-supplement-Appendix.pdf]

# Supplementary Appendix

## Supplementary Figures

- Supplementary Figure 1. The divisions of global geographic areas for the phylogeographic analysis
- Supplementary Figure 2. Phylogeographic estimation for the geographic states of the MRCAs of L2.1, L2.2 and L2.3 sublineages
- Supplementary Figure 3. Phylogeographic estimation for L2.2 and L2.3 after randomly reduced the isolate number from China
- Supplementary Figure 4. Pairwise SNP distance distributions of indigenous genotypes
- Supplementary Figure 5. Ancestral state estimation for L4.2, L4.4 and L4.5 sublineages
- Supplementary Figure 6. Principal-component analysis of five L4 sublineages
- Supplementary Figure 7. Bayesian based dating results from MTBC-6 model
- Supplementary Figure 8. Maximum likelihood phylogeny of sublineage L4.2
- Supplementary Figure 9. Maximum likelihood phylogeny of sublineage L4.4
- Supplementary Figure 10. Geographic areas divisions of China for the phylogeographic analysis
- Supplementary Figure 11. Estimation of the geographic origins of L4 sublineages in China

## Supplementary Tables

- Supplementary Table 1. Collected spoligotyping records of 16,621 MTBC isolates from China
- Supplementary Table 2. SNP typing results of 4,578 MTBC isolates from 76 county sites in China
- Supplementary Table 3. Geographic and sequencing information of 306 whole-genome sequenced isolates in this study
- Supplementary Table 4. The source information of 15,319 MTBC genomes representing the global diversity of MTBC
- Supplementary Table 5. Comparison of cluster rates between sublineages using different sets of VNTR loci
- Supplementary Table 6. SNP typing results of global MTBC isolates based on whole genome sequences
- Supplementary Table 7. Primer and probe sequences for SNP genotyping

## Supplementary Text

- Supplementary Discussion

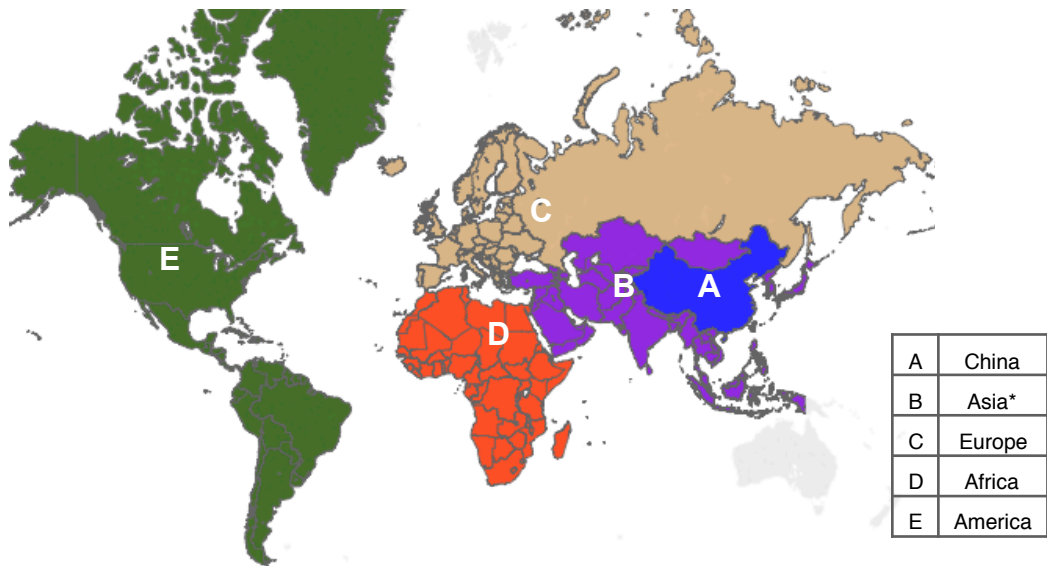

**Supplementary Figure 1. The divisions of global geographic areas for the phylogeographic analysis.** To estimate the origins of those MTBC sublineages detected in China, we divided the world map into five broad geographic areas and used them as a proxy for the most likely origin of each strain. We set China as an independent area from Asia because we want to test whether the indigenous genotypes were from single origins. Asia\* refers to Asia region excluding China. We didn't subdivide America continent into different regions because only a few isolates with whole genome sequence were isolated there.

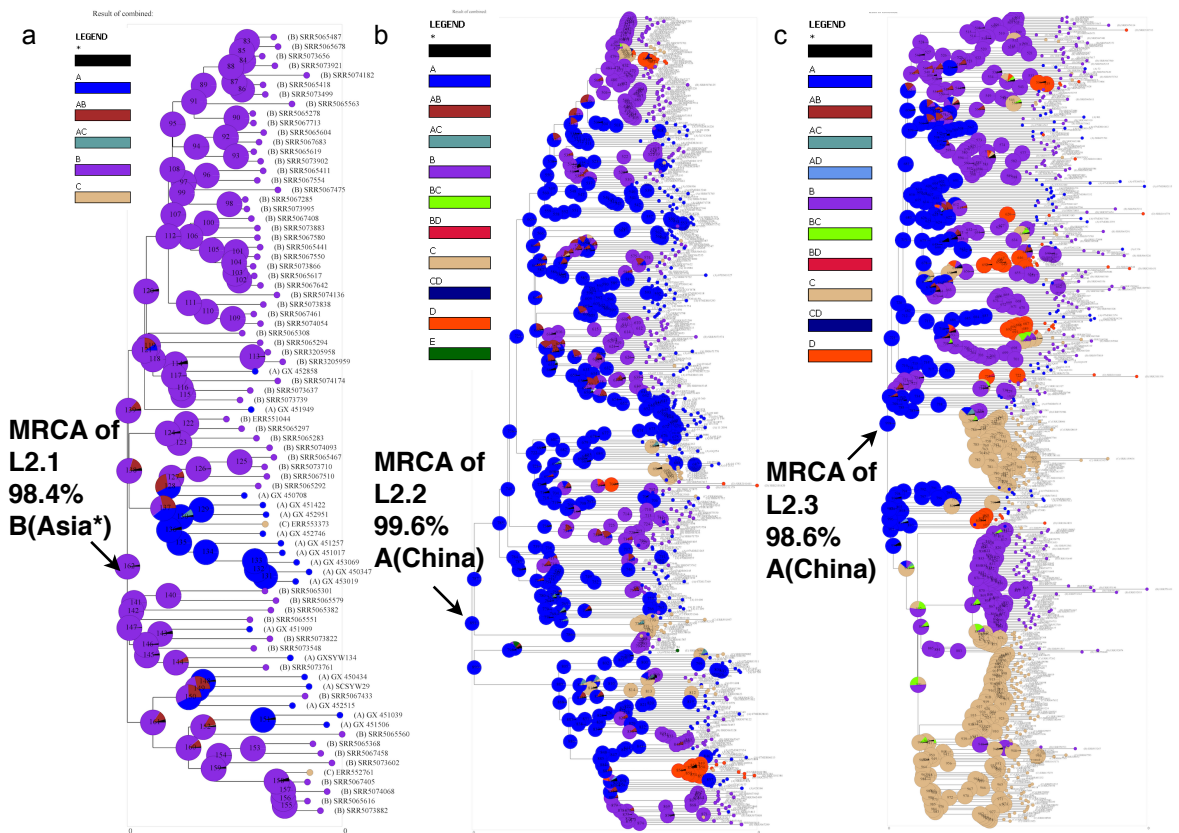

**Supplementary Figure 2. Phylogeographic estimation for the geographic states of the MRCAs of L2.1, L2.2 and L2.3 sublineages.** The results from Bayesian Binary MCMC (BBM) method showing the ancestor states of L2.1 (a), L2.2 (b) and L2.3 (c). Pie-charts reflect probability of the respective area. Areas are colored as in the legends allowing for single or combined distributions. The probabilities for each sublineage's MRCA are indicated in the corresponding node. As RASP software only allow a maximum of 500 samples for analysis, we randomly sampled 500 isolates from 3,449 L2.3 isolates of global origin while all isolates of L2.1 or L2.2 were used for this analysis. The results from Statistical Dispersal-Vicariance analysis (S-DIVA) method showed very high consistency with BBM method and were not shown here.

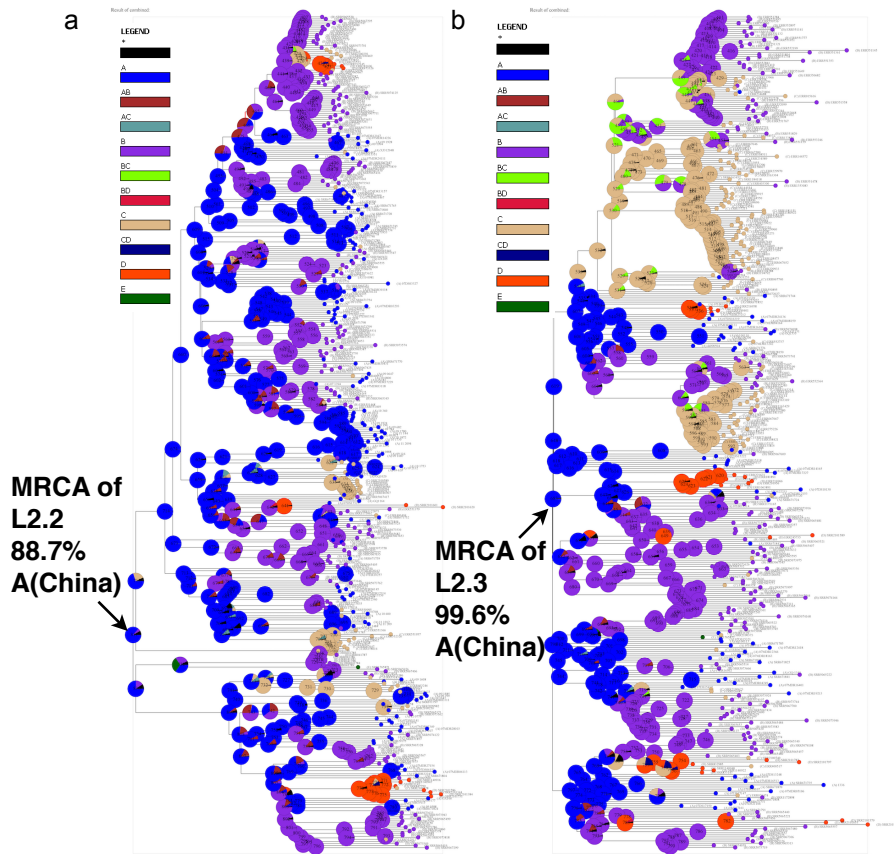

**Supplementary Figure 3. Phylogeographic estimation for L2.2 and L2.3 after randomly reduced the isolate number from China.** The results from Bayesian Binary MCMC (BBM) method showing the ancestor states L2.2 (a) and L2.3 (b). For the analysis of L2.2 sublineage, the isolates numbers from China, Germany, Guatemala, India, Japan, Malawi, Mali, Portugal, Russia, South Africa, UK, Uzbekistan and Vietnam were 120, 11, 1, 8, 7, 4, 1, 2, 6, 10, 27, 3 and 161 respectively. For the analysis of L2.3 sublineage, the isolates numbers from Afgan, Belarus, China, Germany, Guatemala, India, Malawi, Portugal, Russia, South\_Africa, Thailand, UK, Uzbekistan and Vietnam were 3, 22, 77, 6, 1, 3, 12, 1, 84, 10, 1, 12, 57 and 111 respectively.

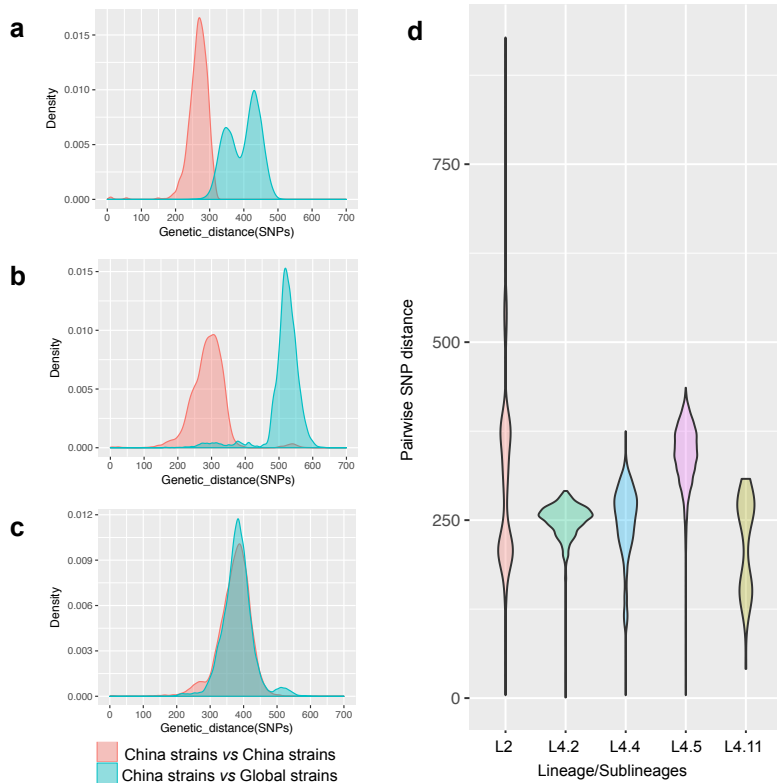

**Supplementary Figure 4. Pairwise SNP distance distributions of indigenous genotypes.** “China strains vs China strains” shows the pairwise SNP distance of MTBC strains from China of the corresponding sublineage. “China strains vs Globe strains” shows the pairwise SNP distance distribution of each China strain and each strain Global strain in the corresponding sublineage. These distributions indicate L4.2 (a) and L4.4 (b) strains from China formed deeply separated populations to those from global collections. However, L4.5 (c) strains in China could not be separated from global L4.5 strains, which was because the most of the genetic diversity in L4.5 were sampled in China (except two early diverged strains sampled from Russia) and most of globally sampled L4.5 strains were descendants from China L4.5 clade. d) The violin plot shows the pairwise SNP distance distributions between the major genotypes observed in China.

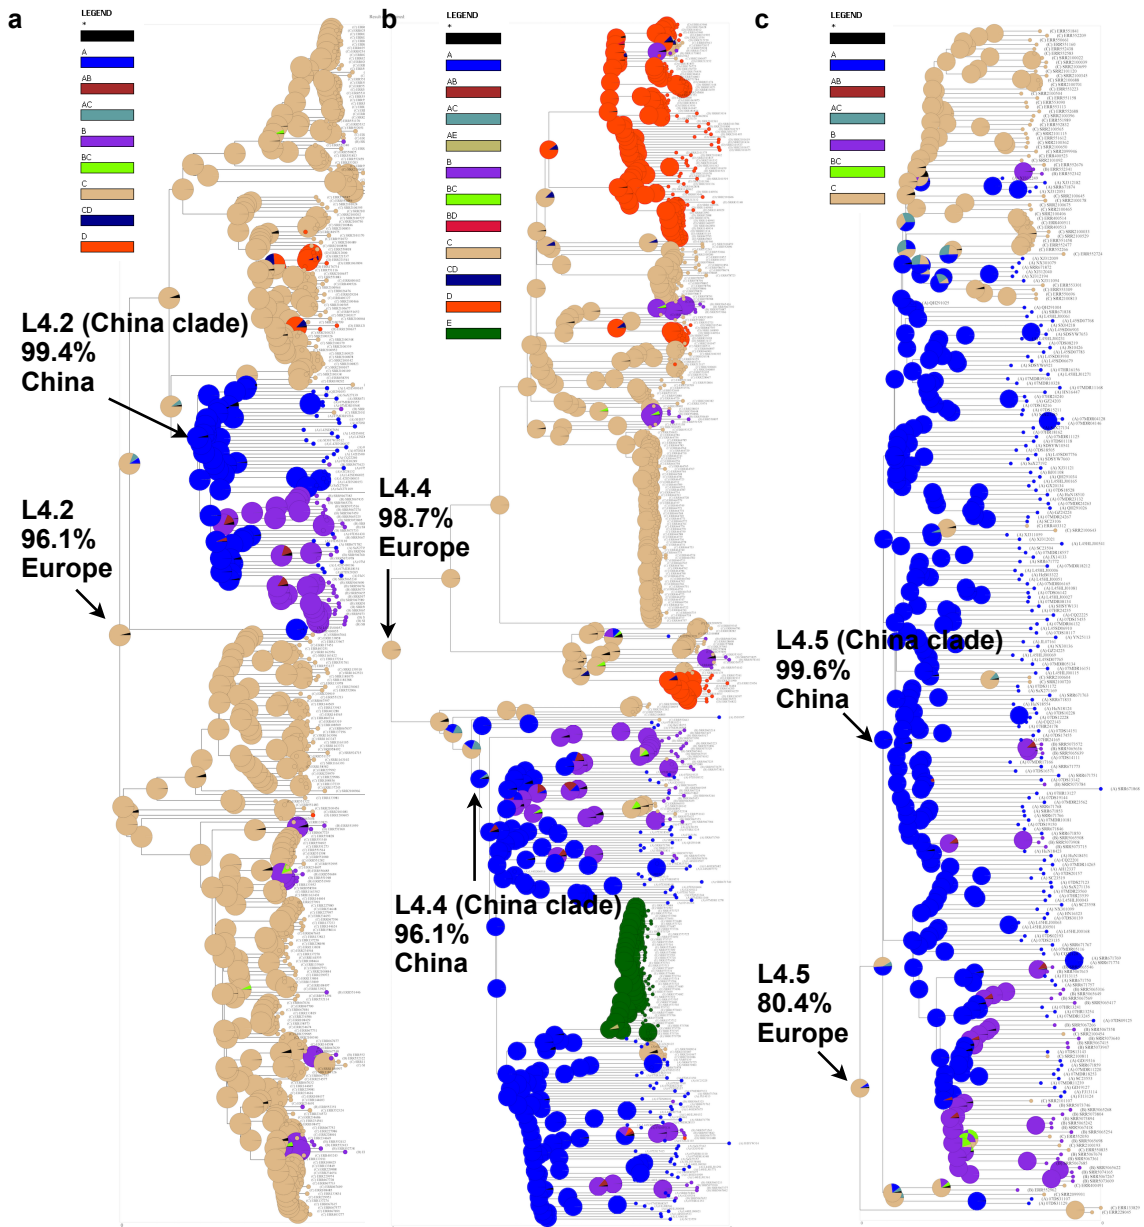

**Supplementary Figure 5. Ancestral state estimation for L4.2, L4.4 and L4.5 sublineages.** The geographic areas divisions refer Supplementary Figure 1. The probabilities for each sublineage's MRCA and the China specific clades are indicated in the corresponding node.

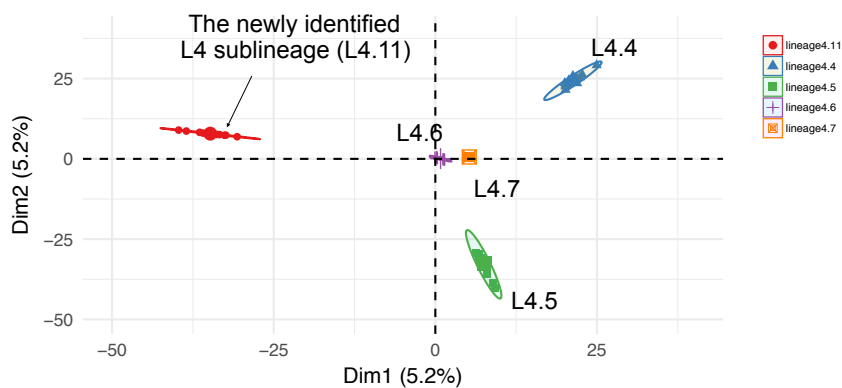

**Supplementary Figure 6. Principal-component analysis of five lineage 4 sublineages.**

Principal-component analysis was conducted for the newly identified sublineage L4.11 and its four closest neighbor sublineages using the SNP matrices derived from whole-genome analysis. The first two principal-component axes (Dim1 and Dim2) are shown. This analysis demonstrated discriminative separation between L4.11 and the neighbor sublineages.

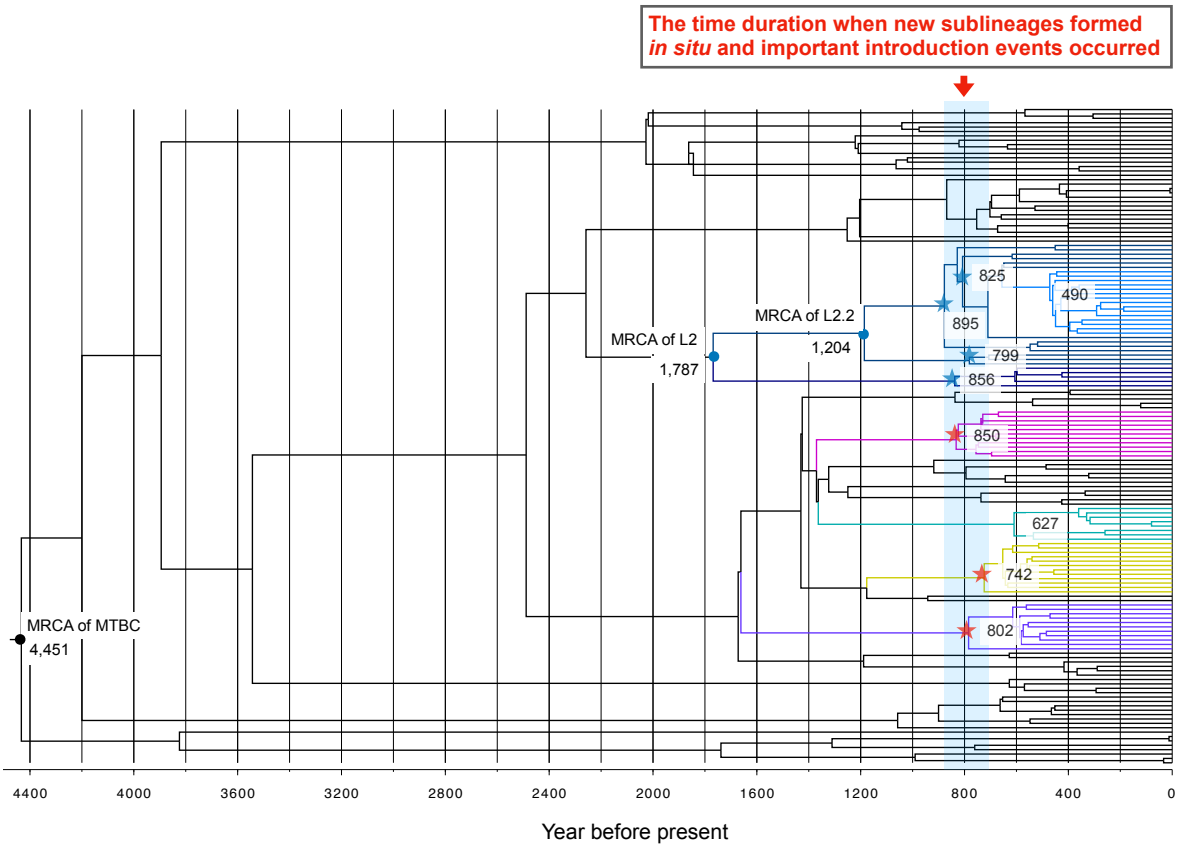

**Supplementary Figure 7. Bayesian based dating results from MTBC-6 model.** Numbers on the nodes are the diverged time (before present) corresponding to the median height of the node.



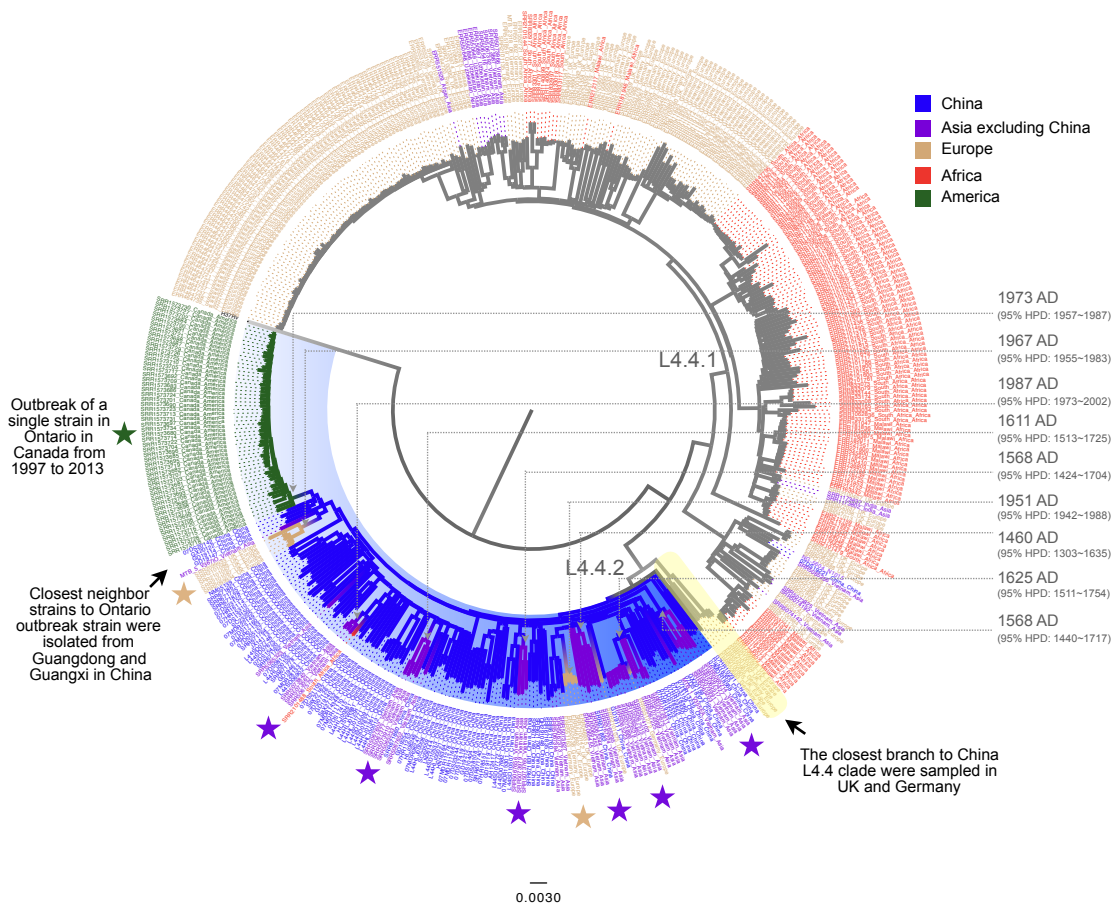

**Supplementary Figure 8. Maximum likelihood phylogeny of sublineage L4.4.** Different leaf colors refer to different geographic origin of those isolates. The China L4.4 clade was highlighted with blue background and the branches were colored according to the geographic their geographic attributions. The major country transition events were marked with a star symbol, and transition time of each event was estimated with BEAST under MTBC-6 model. The closest brach that diverged before China clade was sampled from UK and Germany. The outbreak strain in Ontario turned out to be a descendant of China L4.4 clade, and the most recent common ancestor of that outbreak strain was estimated to emerge around 1973 AD. The closest neighbor strains to that clade were sampled from Guangdong and Guangxi provinces(South China), suggesting recent human migration brought that strain to Ontario.

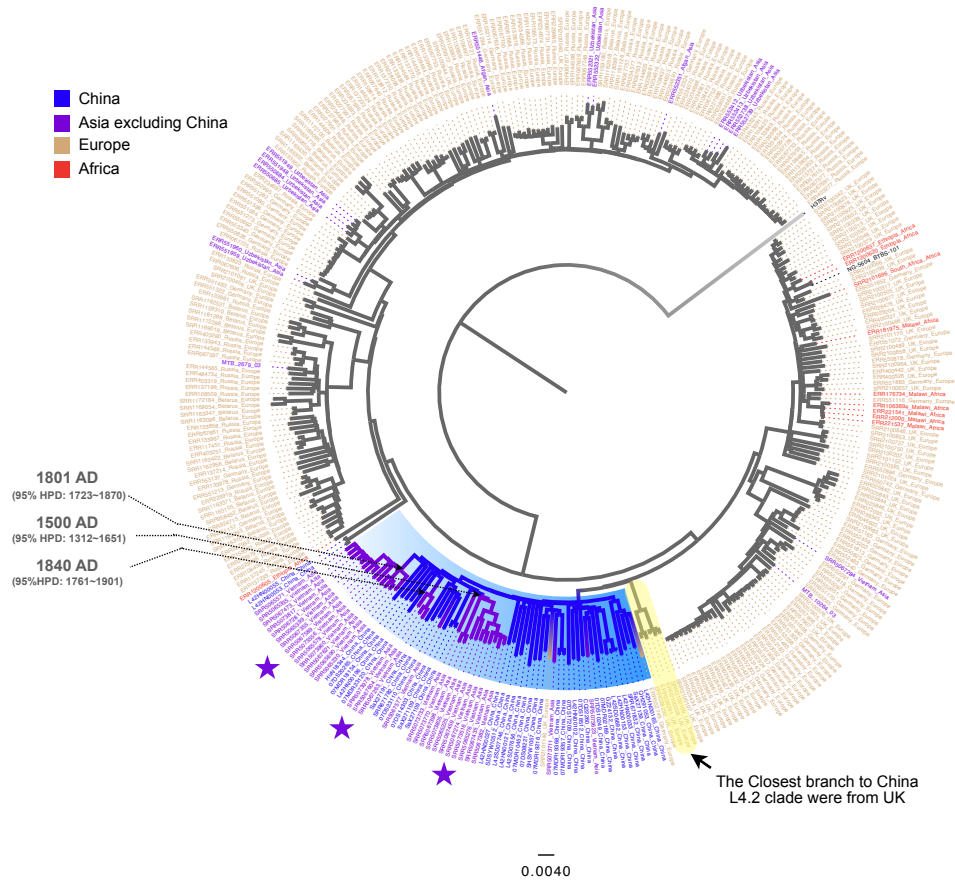

**Supplementary Figure 9. Maximum likelihood phylogeny of sublineage L4.2.** Different leaf colors refer to different present geographic distribution of those isolates. The China L4.2 clade was highlighted with blue background and the branches were colored according to the geographic their geographic attributions. The major country transition events were marked with a star symbol, and transition time of each event was estimated with BEAST under MTBC-6 model. The closest brach that diverged before China clade was sampled from UK.

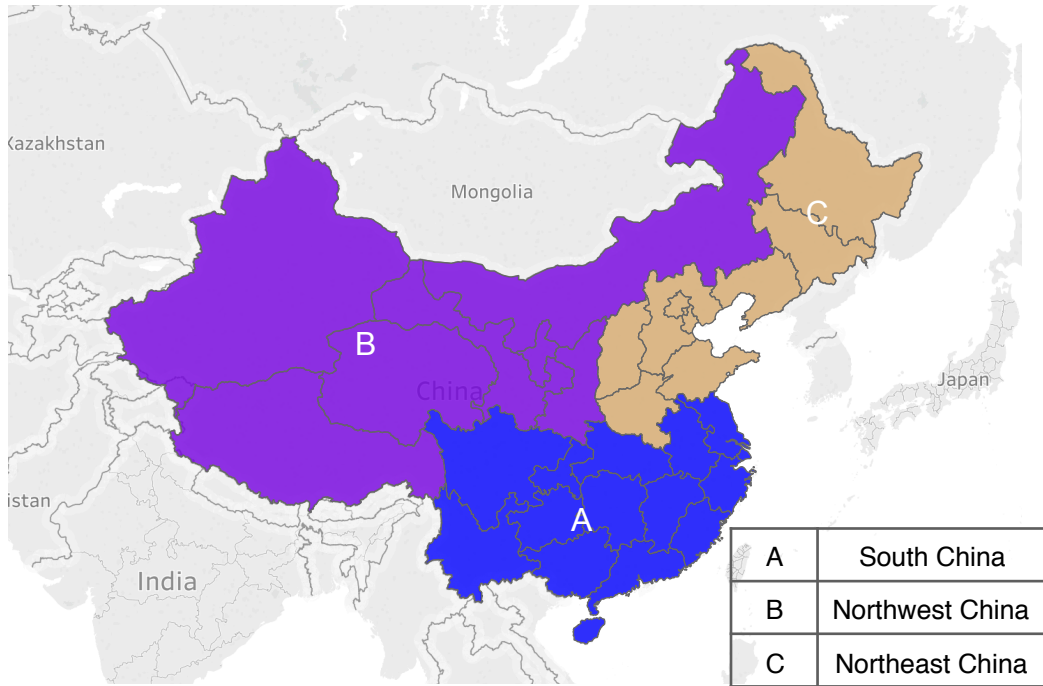

**Supplementary Figure 10. China geographic areas divisions for the phylogeographic analysis.** For estimation of L4 strains' origin in China, we divided the map into three broad areas refer different origin hypothesis. "A" represent south region and include provinces of Anhui, Chongqing, Fujian, Guangdong, Guangxi, Guizhou, Hainan, Hubei, Hunan, Jiangxi, Jiangsu, Shanghai, Sichuan, Yunan, Zhejiang. "B" represent northwest region and includes provinces of Gansu, Inner Mongolia, Ningxia, Qinghai, Shaanxi, Tibet and Xinjiang. "C" represents northeast region including Beijing, Hebei, Heilongjiang, Henan, Jilin, Liaoning, Shandong, Shanxi and Tianjin.

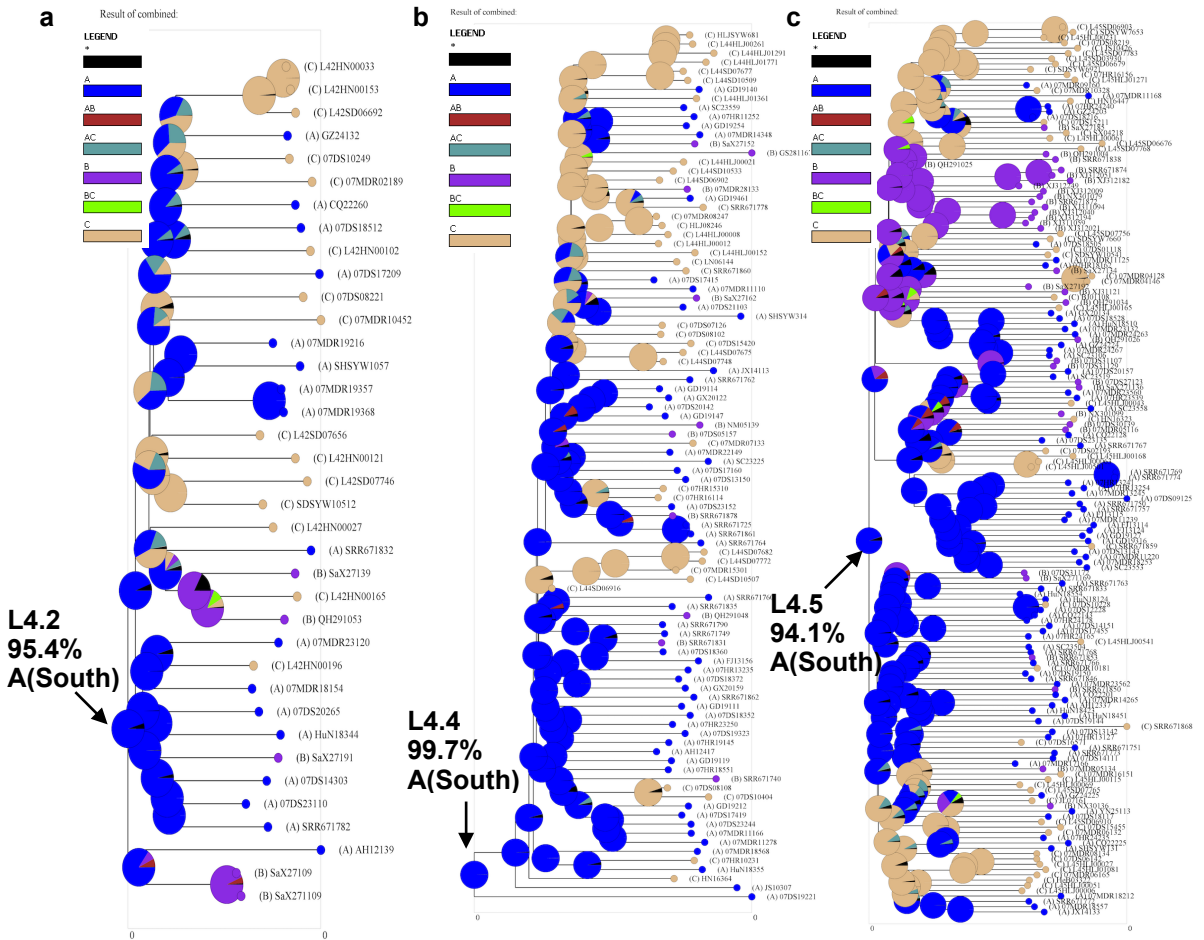

**Supplementary Figure 11. Estimation of the geographic origins of L4 sublineages in China.** (a), (b) and (c) show the phylogeographic reconstructions of ancestral states of China's L4.2, L4.4 and L4.5 strains respectively.

**Supplementary Table 1. Collected spoligotyping records of 16,621 MTBC isolates from China.**

| Provinces    | Reference | Total | L1 | L3 | L2   | L4  | Beijing | T1 | T2 | T3 | T4 | T5 | H1 | H3 | H4 | U  | S | X1 | H37Rv | LAM1 | LAM3 | LAM | LAM7 | LAM8 | LAM9 | LAM10 | CAS | CAS-Delhi | MANU2 | BCG | New |
|--------------|-----------|-------|----|----|------|-----|---------|----|----|----|----|----|----|----|----|----|---|----|-------|------|------|-----|------|------|------|-------|-----|-----------|-------|-----|-----|
| Anhui        | 1         | 236   |    |    | 152  | 17  | 152     | 9  | 4  | 2  |    |    |    |    |    |    | 2 |    |       |      |      |     |      |      |      |       |     |           | 19    | 48  |     |
| Beijing      | 2         | 1585  |    | 1  | 1300 | 122 | 1300    | 69 | 24 | 10 | 2  |    |    | 3  | 1  | 12 | 1 |    |       |      |      |     |      |      |      |       | 1   | 76        | 2     | 84  |     |
| Beijing      | 3         | 260   |    |    | 211  | 37  | 211     | 27 | 7  | 1  |    |    |    |    |    |    | 2 |    |       |      |      |     |      |      |      |       |     |           |       | 12  |     |
| Beijing      | 1         | 57    |    |    | 47   | 8   | 47      | 6  |    | 2  |    |    |    |    |    |    |   |    |       |      |      |     |      |      |      |       |     |           |       | 2   |     |
| Chongqing    | 4         | 208   |    |    | 156  | 25  | 156     | 17 | 4  |    |    |    |    | 2  |    |    | 1 |    |       |      |      |     |      |      | 1    |       |     | 7         | 20    |     |     |
| Chongqing    | 5         | 297   |    |    | 198  | 77  | 198     | 53 | 13 | 1  | 1  |    |    | 4  |    | 3  |   |    |       |      |      |     |      |      | 1    | 1     |     | 2         | 20    |     |     |
| Chongqing    | 1         | 127   |    | 2  | 67   | 37  | 67      | 21 | 9  | 5  |    |    |    | 1  |    | 1  |   |    |       |      |      |     |      |      |      | 2     |     |           | 21    |     |     |
| Fujian       | 1         | 100   |    | 4  | 30   | 27  | 30      | 8  | 6  |    |    |    |    | 4  |    | 9  |   |    |       |      |      |     |      |      |      | 4     |     | 3         | 36    |     |     |
| Guangdong    | 1         | 235   |    |    | 75   | 63  | 75      | 26 | 16 | 1  | 1  |    |    | 9  |    | 10 |   |    |       |      |      |     |      |      |      |       |     | 9         | 88    |     |     |
| Gansu        | 6         | 467   |    | 1  | 409  | 32  | 409     | 20 | 3  | 2  |    |    |    |    | 5  | 2  |   |    |       |      |      |     |      |      |      |       | 1   | 3         | 22    |     |     |
| Gansu        | 1         | 55    |    |    | 47   | 6   | 47      | 1  | 1  |    |    |    |    |    | 3  | 1  |   |    |       |      |      |     |      |      |      |       |     |           | 2     |     |     |
| Guangxi      | 1         | 108   |    | 1  | 34   | 24  | 34      | 20 | 3  |    |    |    |    |    |    | 1  |   |    |       |      |      |     |      |      |      | 1     |     | 12        | 37    |     |     |
| Guizhou      | 1         | 149   |    | 1  | 89   | 39  | 89      | 20 | 5  | 7  |    | 1  | 3  |    |    | 3  |   |    |       |      |      |     |      |      |      | 1     |     | 5         | 15    |     |     |
| Hainan       | 1         | 13    |    |    | 7    | 1   | 7       | 1  |    |    |    |    |    |    |    |    |   |    |       |      |      |     |      |      |      |       |     | 2         | 3     |     |     |
| Hebei        | 7         | 1017  |    |    | 920  | 73  | 920     | 39 | 15 | 5  | 1  | 1  |    | 7  |    | 1  |   |    |       | 1    |      |     |      |      |      | 3     |     | 7         | 17    |     |     |
| Hebei        | 1         | 188   |    |    | 155  | 9   | 155     | 4  | 3  | 2  |    |    |    |    |    |    |   |    |       |      |      |     |      |      |      |       |     | 7         | 1     | 16  |     |
| Heilongjiang | 8         | 200   |    |    | 189  | 11  | 189     |    |    |    |    |    |    |    |    |    |   |    |       |      |      |     |      |      |      |       |     |           |       |     |     |
| Heilongjiang | 1         | 118   |    | 2  | 96   | 9   | 96      | 3  | 3  |    |    | 2  |    |    |    | 1  |   |    |       |      |      |     |      |      |      | 2     |     | 2         | 9     |     |     |
| Henan        | 9         | 443   |    |    | 387  | 52  | 387     | 50 |    |    |    |    |    |    |    |    | 1 |    |       |      |      | 1   |      |      |      |       |     | 4         | 0     |     |     |
| Henan        | 1         | 263   |    | 1  | 213  | 26  | 213     | 10 | 8  | 1  | 1  | 1  |    |    |    | 1  | 1 |    |       |      |      |     |      |      |      |       |     | 12        | 11    |     |     |
| Hubei        | 10        | 105   |    |    | 86   | 19  | 86      |    |    |    |    |    |    |    |    |    |   |    |       |      |      |     |      |      |      |       |     |           |       |     |     |
| Hubei        | 1         | 236   |    | 1  | 168  | 27  | 168     | 16 | 4  | 3  |    | 1  |    |    |    | 3  |   |    |       |      |      |     |      |      |      | 1     |     | 26        | 14    |     |     |
| Hunan        | 11        | 171   |    | 1  | 126  | 38  | 126     | 34 |    |    |    |    |    |    |    | 4  |   |    |       |      |      |     |      |      |      |       | 1   | 1         | 5     |     |     |
| Hunan        | 1         | 319   |    | 7  | 155  | 104 | 155     | 73 | 15 | 8  | 1  | 1  |    |    |    | 2  |   |    |       |      |      |     |      |      |      | 7     |     | 9         | 44    |     |     |
| Jiangsu      | 12        | 287   |    |    | 233  | 38  | 233     | 33 |    |    |    |    |    |    |    | 1  | 4 |    |       |      |      |     |      |      |      |       |     | 3         | 13    |     |     |
| Jiangsu      | 13        | 497   |    |    | 403  | 64  | 403     | 42 | 15 | 1  |    | 3  |    |    |    |    | 2 |    |       |      |      |     |      |      | 1    |       |     | 20        | 10    |     |     |

|                   |    |       |     |     |       |      |       |      |     |    |    |    |    |     |    |     |    |   |   |   |   |    |    |    |    |   |    |    |     |   |      |
|-------------------|----|-------|-----|-----|-------|------|-------|------|-----|----|----|----|----|-----|----|-----|----|---|---|---|---|----|----|----|----|---|----|----|-----|---|------|
| Jiangsu           | 1  | 197   |     | 3   | 134   | 32   | 134   | 20   | 9   | 1  | 1  |    |    |     |    |     |    |   |   |   |   | 3  | 10 | 18 |    |   |    |    |     |   |      |
| Jiangsu, Zhejiang | 14 | 209   | 1   |     | 163   | 45   | 163   | 32   |     |    |    |    |    | 5   |    |     | 8  |   |   |   |   |    |    |    |    |   |    |    |     |   |      |
| Jilin             | 1  | 64    |     | 1   | 49    | 8    | 49    | 2    | 2   | 1  |    |    |    | 3   |    |     |    |   |   |   |   | 1  |    | 6  |    |   |    |    |     |   |      |
| Jiangxi           | 1  | 172   |     | 2   | 111   | 23   | 111   | 18   | 2   | 1  |    |    | 1  | 1   |    |     |    |   |   |   |   | 2  | 6  | 30 |    |   |    |    |     |   |      |
| Liaoning          | 1  | 63    |     | 1   | 48    | 4    | 48    | 1    | 2   |    |    |    |    | 1   |    |     |    |   |   |   |   |    | 7  | 3  |    |   |    |    |     |   |      |
| Inner Mongolia    | 15 | 372   |     |     | 318   | 23   | 318   | 13   | 4   |    | 1  | 3  |    |     |    |     | 1  |   |   |   |   |    | 1  | 30 |    |   |    |    |     |   |      |
| Inner Mongolia    | 1  | 35    |     |     | 31    | 2    | 31    | 1    |     |    |    |    |    | 1   |    |     |    |   |   |   |   |    |    | 2  |    |   |    |    |     |   |      |
| Ningxia           | 1  | 63    |     | 1   | 52    | 7    | 52    | 4    | 1   | 1  |    |    |    | 1   |    |     |    |   |   |   |   | 1  | 0  | 3  |    |   |    |    |     |   |      |
| Qinghai           | 1  | 41    |     | 2   | 34    | 4    | 34    | 1    | 3   |    |    |    |    |     |    |     |    |   |   |   |   | 2  | 1  |    |    |   |    |    |     |   |      |
| Shaanxi           | 16 | 89    |     |     | 79    | 10   | 79    | 4    |     |    |    |    | 1  |     | 1  | 1   | 1  |   |   |   | 1 | 1  |    |    |    |   |    |    |     |   |      |
| Shaanxi           | 1  | 53    |     |     | 36    | 9    | 36    | 4    | 3   | 2  |    |    |    |     |    |     |    |   |   |   |   |    | 1  | 7  |    |   |    |    |     |   |      |
| Shandong Jiangsu  | 17 | 1222  | 8   | 8   | 967   | 178  | 967   |      |     |    |    |    |    |     |    |     |    |   |   |   |   |    |    | 61 |    |   |    |    |     |   |      |
| Shandong          | 1  | 235   |     | 1   | 184   | 31   | 184   | 9    | 11  | 1  |    |    |    | 10  |    |     |    |   |   |   |   | 1  | 2  | 17 |    |   |    |    |     |   |      |
| Shanxi            | 1  | 117   |     |     | 82    | 4    | 82    | 3    | 1   |    |    |    |    |     |    |     |    |   |   |   |   |    | 17 | 14 |    |   |    |    |     |   |      |
| Shanghai          | 1  | 62    |     | 1   | 50    | 4    | 50    | 3    |     |    | 1  |    |    |     |    |     |    |   |   |   |   | 1  | 4  | 3  |    |   |    |    |     |   |      |
| Sichuan           | 18 | 265   |     |     | 143   | 96   | 143   | 80   |     |    |    |    | 9  | 7   |    |     |    |   |   |   |   |    |    | 26 |    |   |    |    |     |   |      |
| Sichuan           | 19 | 213   |     |     | 150   | 42   | 150   | 39   |     |    |    |    | 3  |     |    |     |    |   |   |   |   |    | 9  | 12 |    |   |    |    |     |   |      |
| Sichuan           | 20 | 306   |     |     | 212   | 85   | 212   | 57   |     |    |    |    | 18 |     |    |     |    |   |   |   |   |    |    | 9  |    |   |    |    |     |   |      |
| Sichuan           | 1  | 305   |     | 4   | 138   | 87   | 138   | 70   | 13  |    |    |    | 2  | 2   |    |     |    |   |   |   |   | 4  | 5  | 71 |    |   |    |    |     |   |      |
| Taiwan            | 21 | 421   | 120 |     | 176   | 104  | 176   |      |     |    |    |    |    |     |    |     |    |   |   |   |   |    |    | 21 |    |   |    |    |     |   |      |
| Taiwan            | 22 | 334   | 91  | 0   | 116   | 110  | 116   |      |     |    |    |    |    |     |    |     |    |   |   |   |   |    |    | 17 |    |   |    |    |     |   |      |
| Tianjin           | 1  | 66    |     | 0   | 57    | 3    | 57    | 3    |     |    |    |    |    |     |    |     |    |   |   |   |   |    | 5  | 1  |    |   |    |    |     |   |      |
| Tibet             | 23 | 576   |     | 18  | 522   | 27   | 522   | 25   |     | 1  | 1  |    |    |     |    |     |    |   |   |   |   | 18 |    | 9  |    |   |    |    |     |   |      |
| Tibet             | 1  | 17    |     | 1   | 12    | 2    | 12    | 2    |     |    |    |    |    |     |    |     |    |   |   |   |   |    | 1  | 1  |    |   |    |    |     |   |      |
| Xinjiang          | 1  | 133   |     | 35  | 56    | 23   | 56    | 12   | 1   |    |    |    | 1  | 8   |    |     |    |   |   |   |   |    | 17 | 2  |    |   |    |    |     |   |      |
| Yunnan            | 1  | 55    |     | 3   | 27    | 10   | 27    | 6    |     | 1  | 1  | 1  | 1  |     |    |     |    |   |   |   |   |    | 6  | 9  |    |   |    |    |     |   |      |
| Zhejiang          | 24 | 274   |     |     | 251   | 20   | 251   | 12   | 4   |    |    |    |    |     |    |     | 4  |   |   |   |   |    | 3  |    |    |   |    |    |     |   |      |
| Zhejiang          | 1  | 135   |     | 2   | 64    | 23   | 64    | 15   | 4   | 1  |    |    | 1  | 2   |    |     |    |   |   |   |   |    | 9  | 37 |    |   |    |    |     |   |      |
| 13 Provinces      | 25 | 2346  | 7   | 12  | 1738  | 494  | 1738  | 219  | 74  | 23 | 12 | 3  | 11 | 74  | 10 | 38  | 8  | 2 | 2 |   | 1 | 2  | 2  | 10 | 3  | 7 | 5  | 38 | 57  |   |      |
| Whole country     | 26 | 440   | 0   | 1   | 349   | 75   | 349   |      |     |    |    |    |    |     |    |     |    |   |   |   |   |    |    |    |    |   |    |    | 15  |   |      |
| Total             |    | 16621 | 227 | 118 | 12302 | 2570 | 12302 | 1257 | 292 | 84 | 21 | 17 | 14 | 144 | 27 | 134 | 19 | 3 | 3 | 1 | 2 | 9  | 2  | 2  | 16 | 6 | 56 | 10 | 371 | 3 | 1030 |

## Reference:

1. Pang, Y. et al. Spoligotyping and drug resistance analysis of *Mycobacterium tuberculosis* strains from national survey in China. *PLoS One* 7, e32976 (2012).
2. Liu, Y. et al. Genotypic diversity analysis of *Mycobacterium tuberculosis* strains collected from Beijing in 2009, using spoligotyping and VNTR typing. *PLoS One* 9, e106787 (2014).
3. Lu, B. et al. Genetic diversity of *Mycobacterium tuberculosis* isolates from Beijing, China assessed by Spoligotyping, LSPs and VNTR profiles. *BMC Infect Dis* 12, 372 (2012).
4. Zhang, D., An, J., Wang, Y. & Pang, Y. Genetic diversity of multidrug-resistant tuberculosis in a resource-limited region of China. *Int J Infect Dis* 29, 7-11 (2014).
5. Zhang, D. et al. Molecular typing and drug susceptibility of *Mycobacterium tuberculosis* isolates from Chongqing Municipality, China. *Infect Genet Evol* 13, 310-6 (2013).
6. Liu, J. et al. First insight into the genotypic diversity of clinical *Mycobacterium tuberculosis* isolates from Gansu Province, China. *PLoS One* 9, e99357 (2014).
7. Li, Y. et al. Characterization of *Mycobacterium tuberculosis* isolates from Hebei, China: genotypes and drug susceptibility phenotypes. *BMC Infect Dis* 16, 107 (2016).
8. Wang, J. et al. Genotypes and characteristics of clustering and drug susceptibility of *Mycobacterium tuberculosis* isolates collected in Heilongjiang Province, China. *J Clin Microbiol* 49, 1354-62 (2011).
9. Zhao, Y. et al. Molecular typing of *Mycobacterium tuberculosis* isolates circulating in Henan, central China. *Exp Ther Med* 4, 949-953 (2012).
10. Han, H. et al. Utility of mycobacterial interspersed repetitive unit typing for differentiating *Mycobacterium tuberculosis* isolates in Wuhan, China. *J Med Microbiol* 56, 1219-23 (2007).
11. Zhao, L.L. et al. Prevalence and molecular characteristics of drug-resistant *Mycobacterium tuberculosis* in Hunan, China. *Antimicrob Agents Chemother* 58, 3475-80 (2014).
12. Pang, H. et al. Molecular characterization and drug-resistance of *Mycobacterium tuberculosis* strains in Xuzhou, China. *Biomed Environ Sci* 27, 960-4 (2014).
13. Lu, W. et al. Genotypes of *Mycobacterium tuberculosis* isolates in rural China: using MIRU-VNTR and spoligotyping methods. *Scand J Infect Dis* 46, 98-106 (2014).
14. Hu, Y. et al. Transmission pattern of drug-resistant tuberculosis and its implication for tuberculosis control in eastern rural China. *PLoS One* 6, e19548 (2011).
15. Yu, Q. et al. Genetic diversity of *Mycobacterium tuberculosis* isolates from Inner Mongolia, China. *PLoS One* 8, e57660 (2013).
16. Zhou, A. et al. Molecular characterization of isoniazid-resistant *Mycobacterium tuberculosis* isolates from Xi'an, China. *Microb Drug Resist* 17, 275-81 (2011).
17. Hu, Y. et al. Comparison of the socio-demographic and clinical features of pulmonary TB patients infected with sub-lineages within the W-Beijing and non-Beijing *Mycobacterium tuberculosis*. *Tuberculosis (Edinb)* 97, 18-25 (2016).
18. Liu, H.C. et al. Molecular Typing Characteristic and Drug Susceptibility Analysis of *Mycobacterium tuberculosis* Isolates from Zigong, China. *Biomed Res Int* 2016, 6790985 (2016).
19. Tang, K. et al. Characterization of rifampin-resistant isolates of *Mycobacterium tuberculosis* from Sichuan in China. *Tuberculosis (Edinb)* 93, 89-95 (2013).
20. Zhao, Y. et al. The population structure of drug-resistant *Mycobacterium tuberculosis* clinical isolates from Sichuan in China. *Infect Genet Evol* 12, 718-24 (2012).
21. Chen, Y.Y. et al. Molecular epidemiology of tuberculosis in Kaohsiung City located at southern Taiwan, 2000-2008. *PLoS One* 10, e0117061 (2015).
22. Chen, Y.Y. et al. Distinct modes of transmission of tuberculosis in aboriginal and non-aboriginal populations in Taiwan. *PLoS One* 9, e112633 (2014).
23. Dong, H. et al. Genetic diversity of *Mycobacterium tuberculosis* isolates from Tibetans in Tibet, China. *PLoS One* 7, e33904 (2012).
24. Xia, Q. et al. Phenotypic and genotypic characterization of pyrazinamide resistance among multidrug-resistant *Mycobacterium tuberculosis* isolates in Zhejiang, China. *Antimicrob Agents Chemother* 59, 1690-5 (2015).
25. Dong, H. et al. Spoligotypes of *Mycobacterium tuberculosis* from different Provinces of China. *J Clin Microbiol* 48, 4102-6 (2010).
26. Jiao, W. et al. A country-wide study of spoligotype and drug resistance characteristics of *Mycobacterium tuberculosis* isolates from children in China. *PLoS One* 8, e84315 (2013).

Supplementary Table 2-1. SNP typing results of 3,227 MTBC isolates from 70 random sites.

| Province       | Site No. | No. of Isolates | L2.1 | L2.2 | L2.3 | L4.1 | L4.2 | L4.3 | L4.4.1 | L4.4.2 | L4.5 | L4.8 | L4.11 | L1 | L3 |
|----------------|----------|-----------------|------|------|------|------|------|------|--------|--------|------|------|-------|----|----|
| Anhui          | 4        | 174             |      | 27   | 135  |      | 4    |      |        | 3      | 5    |      |       |    |    |
| Beijing        | 1        | 52              |      | 10   | 34   |      | 2    |      |        | 0      | 6    |      |       |    |    |
| Chongqing      | 2        | 84              |      | 13   | 44   |      | 9    |      |        | 6      | 11   |      | 1     |    |    |
| Fujian         | 2        | 77              |      | 13   | 41   | 1    | 2    |      |        | 7      | 13   |      |       |    |    |
| Gansu          | 1        | 82              |      | 27   | 51   |      | 0    |      |        | 1      | 2    |      |       |    | 1  |
| Guangdong      | 4        | 175             |      | 26   | 97   |      | 10   |      | 1      | 26     | 14   |      |       | 1  |    |
| Guangxi        | 2        | 62              | 5    | 21   | 18   |      | 5    |      |        | 8      | 5    |      |       |    |    |
| Guizhou        | 2        | 85              |      | 30   | 36   |      | 2    |      |        | 5      | 12   |      |       |    |    |
| Hainan         | 1        | 13              |      | 6    | 5    |      | 0    |      |        | 1      | 1    |      |       |    |    |
| Hebei          | 3        | 143             |      | 21   | 110  |      | 0    |      |        | 3      | 9    |      |       |    |    |
| Heilongjiang   | 2        | 86              |      | 12   | 65   |      | 1    |      |        | 5      | 3    |      |       |    |    |
| Henan          | 5        | 263             |      | 57   | 176  |      | 6    |      |        | 11     | 12   |      |       |    | 1  |
| Hubei          | 4        | 158             |      | 29   | 111  |      | 2    |      |        | 5      | 11   |      |       |    |    |
| Hunan          | 5        | 208             |      | 50   | 86   |      | 14   |      |        | 28     | 30   |      |       |    |    |
| Inner Mongolia | 1        | 64              |      | 9    | 51   |      | 0    |      |        | 2      | 2    |      |       |    |    |
| Jiangsu        | 4        | 201             |      | 35   | 129  |      | 9    |      |        | 15     | 13   |      |       |    |    |
| Jiangxi        | 3        | 142             |      | 13   | 106  |      | 7    |      |        | 6      | 10   |      |       |    |    |
| Jilin          | 1        | 53              |      | 5    | 41   |      | 0    |      |        | 5      | 2    |      |       |    |    |
| Liaoning       | 1        | 59              |      | 9    | 47   |      | 0    |      |        | 1      | 2    |      |       |    |    |
| Ningxia        | 1        | 90              |      | 48   | 31   |      | 0    |      |        | 2      | 8    | 1    |       |    |    |
| Qinghai        | 1        | 63              |      | 29   | 24   |      | 1    |      |        | 2      | 6    |      |       |    | 1  |
| Shaanxi        | 1        | 97              |      | 34   | 39   |      | 0    |      |        | 9      | 13   |      |       |    | 2  |
| Shandong       | 4        | 169             |      | 19   | 133  |      | 3    |      |        | 7      | 7    |      |       |    |    |
| Shanghai       | 1        | 57              |      | 14   | 36   |      | 0    |      |        | 3      | 4    |      |       |    |    |
| Shanxi         | 2        | 89              |      | 10   | 68   |      | 3    |      |        | 0      | 8    |      |       |    |    |
| Sichuan        | 5        | 168             | 2    | 40   | 59   |      | 12   |      |        | 14     | 41   |      |       |    |    |
| Tianjin        | 1        | 64              |      | 2    | 59   |      | 1    |      |        | 1      | 1    |      |       |    |    |
| Tibet          | 1        | 9               |      | 6    | 2    |      | 0    |      |        | 1      | 0    |      |       |    |    |
| Xinjiang       | 2        | 115             |      | 33   | 37   |      | 0    | 2    |        | 0      | 22   |      |       |    | 21 |
| Yunnan         | 1        | 36              |      | 13   | 11   |      | 2    |      |        | 0      | 10   |      |       |    |    |
| Zhejiang       | 2        | 89              | 1    | 26   | 49   |      | 4    |      |        | 4      | 5    |      |       |    |    |
| Whole country  | 70       | 3227            | 8    | 687  | 1931 | 1    | 99   | 2    | 1      | 181    | 288  | 1    | 1     | 1  | 26 |



**Supplementary Table 2-2. SNP typing results of 1,351 MTBC isolates from 6 county sites (population sites).**

| Province     | County Name | Longitude | Latitude | No. of Isolates | L2.1 | L2.2 | L2.3 | L4.5 | L4.2 | L4.4 | L4.8 | L4.1 | L4.11 | L1 |
|--------------|-------------|-----------|----------|-----------------|------|------|------|------|------|------|------|------|-------|----|
| Guangxi      | Baise       | 23.00     | 108.00   | 174             | 3    | 49   | 55   | 16   | 16   | 34   |      | 1    |       |    |
| Heilongjiang | Wuchang     | 44.00     | 126.01   | 183             |      | 12   | 146  | 15   |      | 10   |      |      |       |    |
| Henan        | Weishi      | 34.41     | 114.17   | 194             |      | 44   | 130  | 8    | 9    | 3    |      |      |       |    |
| Sichuan      | Wusheng     | 30.00     | 106.00   | 214             | 2    | 47   | 65   | 44   | 17   | 33   | 1    |      | 5     |    |
| Shandong     | Feixian     | 35.26     | 117.97   | 201             |      | 25   | 134  | 19   | 4    | 17   |      | 1    |       | 1  |
| Shanghai     | Songshi     | 31.00     | 121.00   | 385             |      | 80   | 233  | 24   | 22   | 24   |      |      | 1     | 1  |
| All          |             |           |          | 1351            | 5    | 257  | 763  | 126  | 68   | 121  | 1    | 2    | 6     | 2  |

The fates of 32 isolates that showed ambiguous typing results:

- 1) Six isolates belonged to a newly described sublineage. There were typed as L4 strains, but could not be assigned to a previously defined sublineage. As described in the Results, we found that these isolates formed a phylogenetic clade deeply separated from its sister clades/sublineages. We defined this clade as a new L4 sublineage (L4.11) based on principle component analysis.
- 2) Eleven isolates belonged to rare sublineages that our Real-time PCR probe detecting method was not designed to detect. To reduce cost, we designed probes for the common sublineages identified in our pilot typing results (L2.3, L2.2, L4.5, L4.4, and L4.2). Isolates that did not fit into these sublineages were sent for whole genome sequencing. This is described in the Methods section (line 448-453). Among the eleven isolates in this group, two were identified as L2.1, three as L4.1, one as L4.3, two as L4.8 and three as L1.
- 3) Three isolates were non-tuberculosis mycobacteria (NTM). These isolates failed in one probe detecting assay but were successful in the other probes' detections. The whole-genome sequencing results showed that these isolates were NTM such as *Mycobacterium kansasii* (2 isolates), *Mycobacterium intracellulare* (1 isolate).
- 4) Twelve isolates had poor DNA quality. These isolates failed Real-time PCR probe detection assays and also failed in WGS library construction (ten isolates) or only generated very small numbers of sequencing reads (two isolates).

Samples with signals of mixed infection were not sent for whole-genome sequencing as this situation can easily be identified by checking double peaks from a single probe. In these situations, we recorded the typing result from the major melting peak.

**Supplementary Table 3. Geographic and sequencing information of 306 whole-genome sequenced isolates in this study.**

| Strain ID  | Lineage  | Mapped reads number | Genome Coverage | Average Depth | Province       |
|------------|----------|---------------------|-----------------|---------------|----------------|
| GXSYW247   | LINEAGE4 | 5113618             | 0.9968          | 103.58        | Guangxi        |
| 07HR13233  | LINEAGE4 | 6860847             | 0.9967          | 148.53        | Fujian         |
| SDSYW7641  | LINEAGE4 | 5039782             | 0.9949          | 102.91        | Shandong       |
| L42HN00053 | LINEAGE4 | 3462503             | 0.9991          | 113.52        | Henan          |
| L42HN00055 | LINEAGE4 | 7657175             | 0.9989          | 253.73        | Henan          |
| QH29124    | LINEAGE4 | 3398448             | 0.9982          | 98.11         | Qinghai        |
| 07DS08221  | LINEAGE4 | 3630439             | 0.9963          | 52.28         | Heilongjiang   |
| 07DS10249  | LINEAGE4 | 7934890             | 0.9948          | 172.21        | Jiangsu        |
| 07DS14303  | LINEAGE4 | 4193573             | 0.9876          | 59.27         | Jiangxi        |
| 07DS17209  | LINEAGE4 | 6586784             | 0.9888          | 93.66         | Hubei          |
| 07DS18512  | LINEAGE4 | 5056754             | 0.9952          | 72.43         | Hunan          |
| 07DS20265  | LINEAGE4 | 9222464             | 0.9967          | 191.93        | Guangxi        |
| 07DS23110  | LINEAGE4 | 7021082             | 0.9974          | 151.67        | Sichuan        |
| 07MDR02189 | LINEAGE4 | 2771190             | 0.9805          | 43.65         | Tianjin        |
| 07MDR10452 | LINEAGE4 | 2011774             | 0.9928          | 30.17         | Jiangsu        |
| 07MDR18154 | LINEAGE4 | 2884045             | 0.9963          | 40.30         | Hunan          |
| 07MDR19216 | LINEAGE4 | 2485760             | 0.9935          | 33.34         | Guangdong      |
| 07MDR19357 | LINEAGE4 | 3717574             | 0.9938          | 51.99         | Guangdong      |
| 07MDR19368 | LINEAGE4 | 4924194             | 0.9958          | 68.83         | Guangdong      |
| 07MDR23120 | LINEAGE4 | 6710399             | 0.9930          | 94.59         | Sichuan        |
| AH12139    | LINEAGE4 | 4893382             | 0.9979          | 138.90        | Anhui          |
| CQ22260    | LINEAGE4 | 4468519             | 0.9928          | 142.12        | Chongqing      |
| GZ24132    | LINEAGE4 | 5158399             | 0.9964          | 162.73        | Guizhou        |
| HuN18344   | LINEAGE4 | 4784054             | 0.9947          | 145.92        | Hunan          |
| L42HN00027 | LINEAGE4 | 10645299            | 0.9986          | 352.80        | Henan          |
| L42HN00033 | LINEAGE4 | 7280770             | 0.9990          | 239.29        | Henan          |
| L42HN00102 | LINEAGE4 | 1565626             | 0.9985          | 50.85         | Henan          |
| L42HN00121 | LINEAGE4 | 7551346             | 0.9987          | 248.74        | Henan          |
| L42HN00153 | LINEAGE4 | 8292383             | 0.9988          | 272.26        | Henan          |
| L42HN00165 | LINEAGE4 | 2899035             | 0.9988          | 94.01         | Henan          |
| L42HN00196 | LINEAGE4 | 7201007             | 0.9990          | 235.73        | Henan          |
| L42SD06692 | LINEAGE4 | 5698344             | 0.9987          | 186.51        | Shandong       |
| L42SD07656 | LINEAGE4 | 5364454             | 0.9987          | 175.62        | Shandong       |
| L42SD07746 | LINEAGE4 | 4203978             | 0.9989          | 137.90        | Shandong       |
| QH291053   | LINEAGE4 | 2620110             | 0.9957          | 84.58         | Qinghai        |
| SaX27109   | LINEAGE4 | 4125985             | 0.9977          | 132.55        | Shaanxi        |
| SaX271109  | LINEAGE4 | 3241980             | 0.9982          | 103.69        | Shaanxi        |
| SaX27139   | LINEAGE4 | 3837212             | 0.9974          | 123.17        | Shaanxi        |
| SaX27191   | LINEAGE4 | 3696062             | 0.9965          | 116.72        | Shaanxi        |
| SDSYW10512 | LINEAGE4 | 5217800             | 0.9960          | 105.72        | Shandong       |
| SHSYW1057  | LINEAGE4 | 3889891             | 0.9950          | 79.08         | Shanghai       |
| XJ312027   | LINEAGE4 | 4958130             | 0.9970          | 161.47        | Xinjiang       |
| 07DS19221  | LINEAGE4 | 6762318             | 0.9960          | 99.67         | Guangdong      |
| 07DS05157  | LINEAGE4 | 6392532             | 0.9897          | 92.45         | Inner Mongolia |
| 07DS07126  | LINEAGE4 | 6507780             | 0.9976          | 140.51        | Jilin          |
| 07DS08102  | LINEAGE4 | 8153051             | 0.9970          | 175.07        | Heilongjiang   |
| 07DS08108  | LINEAGE4 | 4449229             | 0.9972          | 63.10         | Heilongjiang   |
| 07DS10404  | LINEAGE4 | 5226047             | 0.9786          | 75.50         | Jiangsu        |
| 07DS13150  | LINEAGE4 | 5899445             | 0.9954          | 123.08        | Fujian         |
| 07DS15420  | LINEAGE4 | 4438677             | 0.9879          | 62.86         | Shandong       |
| 07DS17160  | LINEAGE4 | 5631448             | 0.9954          | 79.80         | Hubei          |
| 07DS17415  | LINEAGE4 | 2972003             | 0.9946          | 46.12         | Hubei          |
| 07DS17419  | LINEAGE4 | 7890291             | 0.9992          | 169.81        | Hubei          |

|             |          |          |        |        |              |
|-------------|----------|----------|--------|--------|--------------|
| 07DS18352   | LINEAGE4 | 9727693  | 0.9968 | 210.22 | Hunan        |
| 07DS18360   | LINEAGE4 | 5233570  | 0.9939 | 74.36  | Hunan        |
| 07DS18372   | LINEAGE4 | 4937205  | 0.9935 | 72.76  | Hunan        |
| 07DS19323   | LINEAGE4 | 7300849  | 0.9871 | 116.33 | Guangdong    |
| 07DS20142   | LINEAGE4 | 6294413  | 0.9937 | 90.99  | Guangxi      |
| 07DS21103   | LINEAGE4 | 2261216  | 0.9911 | 33.63  | Hainan       |
| 07DS23152   | LINEAGE4 | 7864495  | 0.9989 | 168.51 | Sichuan      |
| 07DS23244   | LINEAGE4 | 7744523  | 0.9980 | 161.12 | Sichuan      |
| 07HR10231   | LINEAGE4 | 8732458  | 0.9963 | 188.95 | Jiangsu      |
| 07HR11252   | LINEAGE4 | 9066695  | 0.9993 | 195.53 | Zhejiang     |
| 07HR13235   | LINEAGE4 | 6884319  | 0.9952 | 149.36 | Fujian       |
| 07HR15310   | LINEAGE4 | 6541338  | 0.9969 | 139.74 | Shandong     |
| 07HR16114   | LINEAGE4 | 9884345  | 0.9993 | 213.47 | Henan        |
| 07HR18551   | LINEAGE4 | 6367008  | 0.9959 | 138.06 | Hunan        |
| 07HR19145   | LINEAGE4 | 6761980  | 0.9985 | 144.70 | Guangdong    |
| 07HR23250   | LINEAGE4 | 10632890 | 0.9997 | 227.53 | Sichuan      |
| 07MDR07133  | LINEAGE4 | 6627455  | 0.9986 | 103.77 | Jilin        |
| 07MDR08247  | LINEAGE4 | 3823904  | 0.9991 | 57.32  | Heilongjiang |
| 07MDR11110  | LINEAGE4 | 3508146  | 0.9908 | 52.87  | Zhejiang     |
| 07MDR11166  | LINEAGE4 | 3471420  | 0.9878 | 51.75  | Zhejiang     |
| 07MDR11278  | LINEAGE4 | 2989808  | 0.9908 | 45.27  | Zhejiang     |
| 07MDR14348  | LINEAGE4 | 5313152  | 0.9876 | 79.73  | Jiangxi      |
| 07MDR15301  | LINEAGE4 | 4089826  | 0.9946 | 60.25  | Shandong     |
| 07MDR18568  | LINEAGE4 | 2515974  | 0.9927 | 34.66  | Hunan        |
| 07MDR22149  | LINEAGE4 | 4454920  | 0.9930 | 64.83  | Chongqing    |
| 07MDR28133  | LINEAGE4 | 6262862  | 0.9971 | 89.66  | Gansu        |
| AH12417     | LINEAGE4 | 5045332  | 0.9967 | 157.97 | Anhui        |
| FJ13156     | LINEAGE4 | 5116127  | 0.9975 | 149.34 | Fujian       |
| GD19111     | LINEAGE4 | 4573882  | 0.9961 | 143.83 | Guangdong    |
| GD19114     | LINEAGE4 | 4327072  | 0.9968 | 135.43 | Guangdong    |
| GD19119     | LINEAGE4 | 2327561  | 0.9972 | 72.04  | Guangdong    |
| GD19140     | LINEAGE4 | 4689544  | 0.9957 | 149.01 | Guangdong    |
| GD19147     | LINEAGE4 | 4873097  | 0.9956 | 152.98 | Guangdong    |
| GD19212     | LINEAGE4 | 7421544  | 0.9973 | 236.08 | Guangdong    |
| GD19254     | LINEAGE4 | 3974276  | 0.9959 | 126.24 | Guangdong    |
| GD19461     | LINEAGE4 | 3638998  | 0.9965 | 111.95 | Guangdong    |
| GS281167    | LINEAGE4 | 460961   | 0.9975 | 14.52  | Gansu        |
| GX20122     | LINEAGE4 | 5507056  | 0.9961 | 174.41 | Guangxi      |
| GX20159     | LINEAGE4 | 4197019  | 0.9985 | 126.82 | Guangxi      |
| HLJ08246    | LINEAGE4 | 5626712  | 0.9967 | 173.91 | Heilongjiang |
| HLSYW681    | LINEAGE4 | 5722652  | 0.9978 | 117.03 | Heilongjiang |
| HN16364     | LINEAGE4 | 3420189  | 0.9987 | 102.12 | Henan        |
| HuN18355    | LINEAGE4 | 4639210  | 0.9958 | 144.80 | Hunan        |
| JS10307     | LINEAGE4 | 3556302  | 0.9989 | 97.47  | Jiangsu      |
| JX14113     | LINEAGE4 | 3723514  | 0.9975 | 111.07 | Jiangxi      |
| L44HLJ00008 | LINEAGE4 | 4946363  | 0.9997 | 161.59 | Heilongjiang |
| L44HLJ00012 | LINEAGE4 | 6925093  | 0.9997 | 228.21 | Heilongjiang |
| L44HLJ00021 | LINEAGE4 | 4647278  | 0.9999 | 152.50 | Heilongjiang |
| L44HLJ00152 | LINEAGE4 | 4429540  | 0.9990 | 144.01 | Heilongjiang |
| L44HLJ00261 | LINEAGE4 | 4053732  | 0.9995 | 132.98 | Heilongjiang |
| L44HLJ01291 | LINEAGE4 | 6341900  | 0.9996 | 206.28 | Heilongjiang |
| L44HLJ01361 | LINEAGE4 | 6599592  | 0.9992 | 215.58 | Heilongjiang |
| L44HLJ01771 | LINEAGE4 | 2121794  | 0.9997 | 68.15  | Heilongjiang |
| L44SD06902  | LINEAGE4 | 6404323  | 0.9997 | 211.25 | Shandong     |
| L44SD07675  | LINEAGE4 | 5912449  | 0.9998 | 193.78 | Shandong     |
| L44SD07677  | LINEAGE4 | 5456985  | 0.9988 | 178.77 | Shandong     |

|            |          |          |        |        |                |
|------------|----------|----------|--------|--------|----------------|
| L44SD07682 | LINEAGE4 | 6024187  | 0.9997 | 198.30 | Shandong       |
| L44SD07748 | LINEAGE4 | 6776230  | 0.9997 | 222.99 | Shandong       |
| L44SD07772 | LINEAGE4 | 5420804  | 0.9997 | 178.28 | Shandong       |
| L44SD10507 | LINEAGE4 | 11986079 | 0.9999 | 393.93 | Shandong       |
| L44SD10509 | LINEAGE4 | 11856175 | 0.9986 | 392.03 | Shandong       |
| L44SD10533 | LINEAGE4 | 10111261 | 0.9998 | 333.92 | Shandong       |
| LN06144    | LINEAGE4 | 5193348  | 0.9969 | 158.48 | Liaoning       |
| NM05139    | LINEAGE4 | 4270008  | 0.9980 | 124.65 | Inner Mongolia |
| QH291048   | LINEAGE4 | 2958935  | 0.9992 | 95.96  | Qinghai        |
| SaX27152   | LINEAGE4 | 3876884  | 0.9964 | 117.25 | Shaanxi        |
| SaX27162   | LINEAGE4 | 3152959  | 0.9971 | 100.68 | Shaanxi        |
| SC23225    | LINEAGE4 | 2257746  | 0.9979 | 67.42  | Sichuan        |
| SC23559    | LINEAGE4 | 5650036  | 0.9979 | 175.73 | Sichuan        |
| SHSYW314   | LINEAGE4 | 5825326  | 0.9971 | 119.33 | Shanghai       |
| 07DS01118  | LINEAGE4 | 2468965  | 0.9938 | 36.28  | Beijing        |
| 07DS02193  | LINEAGE4 | 5707208  | 0.9940 | 82.07  | Tianjin        |
| 07DS06142  | LINEAGE4 | 5093503  | 0.9897 | 73.99  | Liaoning       |
| 07DS08219  | LINEAGE4 | 3326905  | 0.9992 | 47.38  | Heilongjiang   |
| 07DS09125  | LINEAGE4 | 3845756  | 0.9668 | 57.54  | Shanghai       |
| 07DS10228  | LINEAGE4 | 5225853  | 0.9867 | 73.37  | Jiangsu        |
| 07DS12228  | LINEAGE4 | 7882355  | 0.9950 | 169.26 | Anhui          |
| 07DS13142  | LINEAGE4 | 3281153  | 0.9929 | 45.66  | Fujian         |
| 07DS13143  | LINEAGE4 | 6741593  | 0.9974 | 145.24 | Fujian         |
| 07DS14111  | LINEAGE4 | 4429661  | 0.9888 | 62.46  | Jiangxi        |
| 07DS14151  | LINEAGE4 | 3082021  | 0.9893 | 43.95  | Jiangxi        |
| 07DS15211  | LINEAGE4 | 3669734  | 0.9878 | 52.31  | Shandong       |
| 07DS15455  | LINEAGE4 | 4058486  | 0.9943 | 58.64  | Shandong       |
| 07DS16571  | LINEAGE4 | 6024358  | 0.9964 | 85.64  | Henan          |
| 07DS17455  | LINEAGE4 | 3284037  | 0.9961 | 46.93  | Hubei          |
| 07DS18117  | LINEAGE4 | 3038644  | 0.9938 | 43.18  | Hunan          |
| 07DS18216  | LINEAGE4 | 5790127  | 0.9966 | 81.55  | Hunan          |
| 07DS18505  | LINEAGE4 | 7474367  | 0.9972 | 159.01 | Hunan          |
| 07DS18528  | LINEAGE4 | 6232699  | 0.9963 | 88.85  | Hunan          |
| 07DS19144  | LINEAGE4 | 7749568  | 0.9969 | 161.34 | Guangdong      |
| 07DS19150  | LINEAGE4 | 8784553  | 0.9992 | 187.87 | Guangdong      |
| 07DS20157  | LINEAGE4 | 4350433  | 0.9931 | 61.72  | Guangxi        |
| 07DS23135  | LINEAGE4 | 7682808  | 0.9991 | 158.98 | Sichuan        |
| 07DS27123  | LINEAGE4 | 8631295  | 0.9954 | 185.10 | Shaanxi        |
| 07DS30139  | LINEAGE4 | 8289529  | 0.9961 | 179.52 | Ningxia        |
| 07DS31107  | LINEAGE4 | 11325838 | 0.9968 | 236.34 | Xinjiang       |
| 07DS31129  | LINEAGE4 | 8454763  | 0.9969 | 182.82 | Xinjiang       |
| 07DS31172  | LINEAGE4 | 10869306 | 0.9964 | 156.87 | Xinjiang       |
| 07HR13127  | LINEAGE4 | 7521560  | 0.9979 | 161.32 | Fujian         |
| 07HR13241  | LINEAGE4 | 5688232  | 0.9968 | 122.05 | Fujian         |
| 07HR13254  | LINEAGE4 | 8362889  | 0.9987 | 178.81 | Fujian         |
| 07HR16156  | LINEAGE4 | 7331670  | 0.9969 | 157.74 | Henan          |
| 07HR18162  | LINEAGE4 | 7795069  | 0.9974 | 168.49 | Hunan          |
| 07HR23539  | LINEAGE4 | 10393384 | 0.9954 | 224.92 | Sichuan        |
| 07HR24165  | LINEAGE4 | 9573228  | 0.9980 | 207.31 | Guizhou        |
| 07HR24178  | LINEAGE4 | 7260680  | 0.9992 | 156.65 | Guizhou        |
| 07HR24235  | LINEAGE4 | 8390063  | 0.9971 | 181.83 | Guizhou        |
| 07HR24240  | LINEAGE4 | 7680962  | 0.9962 | 166.31 | Guizhou        |
| 07MDR04128 | LINEAGE4 | 3004168  | 0.9840 | 46.80  | Shanxi         |
| 07MDR04146 | LINEAGE4 | 3873635  | 0.9857 | 62.73  | Shanxi         |
| 07MDR05116 | LINEAGE4 | 2091343  | 0.9946 | 31.74  | Inner Mongolia |
| 07MDR05134 | LINEAGE4 | 6567896  | 0.9853 | 105.30 | Inner Mongolia |

|             |          |          |        |        |              |
|-------------|----------|----------|--------|--------|--------------|
| 07MDR06132  | LINEAGE4 | 5044129  | 0.9973 | 79.60  | Liaoning     |
| 07MDR06165  | LINEAGE4 | 2808908  | 0.9958 | 42.44  | Liaoning     |
| 07MDR08134  | LINEAGE4 | 3451075  | 0.9878 | 52.88  | Heilongjiang |
| 07MDR09160  | LINEAGE4 | 2283069  | 0.9956 | 34.39  | Shanghai     |
| 07MDR10181  | LINEAGE4 | 7809592  | 0.9954 | 116.33 | Jiangsu      |
| 07MDR10328  | LINEAGE4 | 1968695  | 0.9976 | 29.58  | Jiangsu      |
| 07MDR11125  | LINEAGE4 | 4619162  | 0.9829 | 70.70  | Zhejiang     |
| 07MDR11168  | LINEAGE4 | 9029761  | 0.9906 | 134.43 | Zhejiang     |
| 07MDR11220  | LINEAGE4 | 2737591  | 0.9923 | 41.24  | Zhejiang     |
| 07MDR11239  | LINEAGE4 | 2799336  | 0.9899 | 43.58  | Zhejiang     |
| 07MDR13245  | LINEAGE4 | 4832604  | 0.9917 | 58.70  | Fujian       |
| 07MDR14265  | LINEAGE4 | 7016985  | 0.9841 | 84.19  | Jiangxi      |
| 07MDR16151  | LINEAGE4 | 3794297  | 0.9885 | 60.73  | Henan        |
| 07MDR17166  | LINEAGE4 | 2311568  | 0.9929 | 31.53  | Hubei        |
| 07MDR18212  | LINEAGE4 | 4668878  | 0.9974 | 65.51  | Hunan        |
| 07MDR18253  | LINEAGE4 | 4878943  | 0.9949 | 71.07  | Hunan        |
| 07MDR18557  | LINEAGE4 | 3453099  | 0.9955 | 45.69  | Hunan        |
| 07MDR23132  | LINEAGE4 | 6551663  | 0.9977 | 92.74  | Sichuan      |
| 07MDR23560  | LINEAGE4 | 2675300  | 0.9911 | 41.40  | Sichuan      |
| 07MDR23562  | LINEAGE4 | 6140169  | 0.9882 | 85.67  | Sichuan      |
| 07MDR24263  | LINEAGE4 | 3528159  | 0.9949 | 48.72  | Guizhou      |
| 07MDR24267  | LINEAGE4 | 4477545  | 0.9902 | 63.70  | Guizhou      |
| AH12337     | LINEAGE4 | 4668098  | 0.9929 | 147.06 | Anhui        |
| BJ01108     | LINEAGE4 | 4969847  | 0.9960 | 148.82 | Beijing      |
| CQ22128     | LINEAGE4 | 4879467  | 0.9930 | 155.79 | Chongqing    |
| CQ22143     | LINEAGE4 | 5383610  | 0.9945 | 170.97 | Chongqing    |
| CQ22201     | LINEAGE4 | 5502432  | 0.9951 | 172.78 | Chongqing    |
| CQ22225     | LINEAGE4 | 2347328  | 0.9947 | 71.82  | Chongqing    |
| FJ13114     | LINEAGE4 | 4661433  | 0.9976 | 140.02 | Fujian       |
| FJ13115     | LINEAGE4 | 5667590  | 0.9954 | 173.42 | Fujian       |
| FJ13124     | LINEAGE4 | 3954904  | 0.9931 | 126.43 | Fujian       |
| GD19127     | LINEAGE4 | 7056366  | 0.9965 | 218.10 | Guangdong    |
| GD19316     | LINEAGE4 | 4961801  | 0.9954 | 154.76 | Guangdong    |
| GX20134     | LINEAGE4 | 4747034  | 0.9949 | 149.10 | Guangxi      |
| GZ24203     | LINEAGE4 | 5022607  | 0.9935 | 158.31 | Guizhou      |
| GZ24224     | LINEAGE4 | 4504584  | 0.9940 | 141.24 | Guizhou      |
| GZ24225     | LINEAGE4 | 5188081  | 0.9940 | 163.91 | Guizhou      |
| HeB03322    | LINEAGE4 | 5066512  | 0.9962 | 155.70 | Hebei        |
| HN16323     | LINEAGE4 | 4703515  | 0.9972 | 146.03 | Henan        |
| HN16447     | LINEAGE4 | 3450046  | 0.9970 | 104.50 | Henan        |
| HuN18124    | LINEAGE4 | 3537389  | 0.9961 | 107.16 | Hunan        |
| HuN18423    | LINEAGE4 | 4742483  | 0.9970 | 146.54 | Hunan        |
| HuN18451    | LINEAGE4 | 5547221  | 0.9969 | 169.45 | Hunan        |
| HuN18510    | LINEAGE4 | 4070791  | 0.9987 | 124.00 | Hunan        |
| HuN18554    | LINEAGE4 | 3779086  | 0.9960 | 116.68 | Hunan        |
| JL07161     | LINEAGE4 | 4748511  | 0.9961 | 145.55 | Jilin        |
| JS10426     | LINEAGE4 | 3670962  | 0.9975 | 111.49 | Jiangsu      |
| JX14133     | LINEAGE4 | 5229965  | 0.9971 | 160.95 | Jiangxi      |
| L45HLJ00006 | LINEAGE4 | 4030234  | 0.9999 | 131.89 | Heilongjiang |
| L45HLJ00027 | LINEAGE4 | 8288846  | 0.9991 | 274.24 | Heilongjiang |
| L45HLJ00043 | LINEAGE4 | 7252907  | 0.9986 | 238.78 | Heilongjiang |
| L45HLJ00051 | LINEAGE4 | 14655899 | 0.9999 | 485.99 | Heilongjiang |
| L45HLJ00061 | LINEAGE4 | 4608846  | 0.9997 | 150.73 | Heilongjiang |
| L45HLJ00063 | LINEAGE4 | 6154221  | 0.9993 | 202.05 | Heilongjiang |
| L45HLJ00069 | LINEAGE4 | 5229735  | 0.9994 | 170.66 | Heilongjiang |
| L45HLJ00115 | LINEAGE4 | 5358089  | 0.9994 | 175.02 | Heilongjiang |

|              |          |          |        |        |              |
|--------------|----------|----------|--------|--------|--------------|
| L45HLJ00165  | LINEAGE4 | 3247111  | 0.9995 | 104.80 | Heilongjiang |
| L45HLJ00168  | LINEAGE4 | 3127754  | 0.9989 | 100.27 | Heilongjiang |
| L45HLJ00231  | LINEAGE4 | 6806127  | 0.9998 | 224.86 | Heilongjiang |
| L45HLJ00501  | LINEAGE4 | 10479503 | 0.9989 | 346.38 | Heilongjiang |
| L45HLJ00541  | LINEAGE4 | 3405242  | 0.9994 | 110.64 | Heilongjiang |
| L45HLJ01081  | LINEAGE4 | 4283268  | 0.9993 | 139.63 | Heilongjiang |
| L45HLJ01271  | LINEAGE4 | 4499978  | 0.9999 | 145.99 | Heilongjiang |
| L45SD03930   | LINEAGE4 | 8834649  | 0.9997 | 291.51 | Shandong     |
| L45SD06676   | LINEAGE4 | 421037   | 0.9991 | 13.10  | Shandong     |
| L45SD06679   | LINEAGE4 | 2576641  | 0.9995 | 83.55  | Shandong     |
| L45SD06903   | LINEAGE4 | 8886105  | 0.9987 | 294.60 | Shandong     |
| L45SD06910   | LINEAGE4 | 4997948  | 0.9986 | 163.67 | Shandong     |
| L45SD07756   | LINEAGE4 | 3939955  | 0.9996 | 128.34 | Shandong     |
| L45SD07765   | LINEAGE4 | 6024351  | 0.9991 | 197.63 | Shandong     |
| L45SD07768   | LINEAGE4 | 2687010  | 0.9999 | 87.53  | Shandong     |
| L45SD07783   | LINEAGE4 | 1624010  | 0.9993 | 51.62  | Shandong     |
| NX301079     | LINEAGE4 | 3228752  | 0.9982 | 104.12 | Ningxia      |
| NX301099     | LINEAGE4 | 1012965  | 0.9958 | 32.56  | Ningxia      |
| NX30136      | LINEAGE4 | 4307911  | 0.9991 | 136.11 | Ningxia      |
| QH291004     | LINEAGE4 | 3943322  | 0.9983 | 126.64 | Qinghai      |
| QH291026     | LINEAGE4 | 2761201  | 0.9970 | 89.63  | Qinghai      |
| QH291034     | LINEAGE4 | 3361775  | 0.9997 | 109.30 | Qinghai      |
| SaX271136    | LINEAGE4 | 3263278  | 0.9962 | 106.01 | Shaanxi      |
| SaX271169    | LINEAGE4 | 4518418  | 0.9965 | 146.84 | Shaanxi      |
| SaX27134     | LINEAGE4 | 3311743  | 0.9991 | 105.04 | Shaanxi      |
| SaX27185     | LINEAGE4 | 3900606  | 0.9986 | 124.05 | Shaanxi      |
| SaX27192     | LINEAGE4 | 4094860  | 0.9979 | 131.05 | Shaanxi      |
| SC23106      | LINEAGE4 | 5300260  | 0.9932 | 169.26 | Sichuan      |
| SC23504      | LINEAGE4 | 5478925  | 0.9953 | 169.55 | Sichuan      |
| SC23519      | LINEAGE4 | 5146755  | 0.9945 | 160.80 | Sichuan      |
| SC23553      | LINEAGE4 | 4761992  | 0.9965 | 147.92 | Sichuan      |
| SC23558      | LINEAGE4 | 5020115  | 0.9965 | 151.66 | Sichuan      |
| SDSYW10541   | LINEAGE4 | 5608956  | 0.9994 | 113.37 | Shandong     |
| SDSYW6921    | LINEAGE4 | 4212037  | 0.9965 | 85.60  | Shandong     |
| SDSYW7653    | LINEAGE4 | 4738719  | 0.9960 | 96.33  | Shandong     |
| SDSYW7660    | LINEAGE4 | 2080761  | 0.9966 | 42.05  | Shandong     |
| SHSYW131     | LINEAGE4 | 5832992  | 0.9968 | 118.08 | Shanghai     |
| SX04218      | LINEAGE4 | 6294702  | 0.9970 | 189.78 | Shanxi       |
| XJ311059     | LINEAGE4 | 4902367  | 0.9983 | 159.01 | Xinjiang     |
| XJ311094     | LINEAGE4 | 2749030  | 0.9974 | 88.37  | Xinjiang     |
| XJ31121      | LINEAGE4 | 2912579  | 0.9980 | 87.65  | Xinjiang     |
| XJ312009     | LINEAGE4 | 4687730  | 0.9985 | 151.96 | Xinjiang     |
| XJ312021     | LINEAGE4 | 2776555  | 0.9982 | 88.94  | Xinjiang     |
| XJ312040     | LINEAGE4 | 2540666  | 0.9966 | 81.55  | Xinjiang     |
| XJ312051     | LINEAGE4 | 3179880  | 0.9978 | 103.07 | Xinjiang     |
| XJ312054     | LINEAGE4 | 949674   | 0.9971 | 30.18  | Xinjiang     |
| XJ312182     | LINEAGE4 | 1937195  | 0.9973 | 62.24  | Xinjiang     |
| XJ312194     | LINEAGE4 | 3105087  | 0.9968 | 100.61 | Xinjiang     |
| XJ312210     | LINEAGE4 | 992734   | 0.9968 | 32.21  | Xinjiang     |
| XJ312249     | LINEAGE4 | 1823396  | 0.9980 | 58.68  | Xinjiang     |
| YN25113      | LINEAGE4 | 5435002  | 0.9952 | 162.94 | Yunan        |
| 07DS30138    | LINEAGE4 | 3527003  | 0.9966 | 50.63  | Ningxia      |
| SCSYW2010330 | LINEAGE4 | 4795038  | 0.9969 | 97.15  | Sichuan      |
| 07DS22168    | LINEAGE4 | 7152646  | 0.9947 | 152.40 | Chongqing    |
| SCSYW2010140 | LINEAGE4 | 2780141  | 0.9894 | 57.12  | Sichuan      |
| SCSYW24      | LINEAGE4 | 5504953  | 0.9959 | 111.52 | Sichuan      |

|            |          |         |        |        |           |
|------------|----------|---------|--------|--------|-----------|
| SCSYW53    | LINEAGE4 | 6408272 | 0.9950 | 129.93 | Sichuan   |
| SCSYW92    | LINEAGE4 | 5306101 | 0.9934 | 107.44 | Sichuan   |
| SHSYW1610  | LINEAGE4 | 5158862 | 0.9950 | 104.61 | Shanghai  |
| 07DS31117  | LINEAGE3 | 7912865 | 0.9968 | 164.83 | Xinjiang  |
| 07DS31130  | LINEAGE3 | 8176306 | 0.9965 | 170.18 | Xinjiang  |
| 07DS31169  | LINEAGE3 | 7144530 | 0.9974 | 152.94 | Xinjiang  |
| 07DS31265  | LINEAGE3 | 7085531 | 0.9976 | 147.49 | Xinjiang  |
| 07MDR16424 | LINEAGE3 | 5301190 | 0.9947 | 83.69  | Henan     |
| 07MDR29131 | LINEAGE3 | 3171998 | 0.9966 | 44.68  | Qinghai   |
| 07MDR31213 | LINEAGE3 | 2219793 | 0.9985 | 31.57  | Xinjiang  |
| 07MDR31251 | LINEAGE3 | 5507020 | 0.9891 | 81.52  | Xinjiang  |
| XJ311018   | LINEAGE3 | 2595348 | 0.9972 | 83.46  | Xinjiang  |
| XJ311093   | LINEAGE3 | 2452392 | 0.9986 | 78.84  | Xinjiang  |
| XJ312004   | LINEAGE3 | 4125012 | 0.9990 | 133.90 | Xinjiang  |
| XJ312005   | LINEAGE3 | 3708057 | 0.9981 | 119.88 | Xinjiang  |
| XJ312006   | LINEAGE3 | 3036957 | 0.9975 | 97.88  | Xinjiang  |
| XJ312007   | LINEAGE3 | 1008497 | 0.9964 | 32.78  | Xinjiang  |
| XJ312011   | LINEAGE3 | 2214607 | 0.9980 | 71.09  | Xinjiang  |
| XJ312029   | LINEAGE3 | 5028231 | 0.9989 | 163.57 | Xinjiang  |
| XJ312059   | LINEAGE3 | 2428021 | 0.9969 | 78.01  | Xinjiang  |
| XJ312081   | LINEAGE3 | 2885554 | 0.9962 | 93.98  | Xinjiang  |
| XJ312181   | LINEAGE3 | 1340690 | 0.9987 | 42.77  | Xinjiang  |
| XJ312207   | LINEAGE3 | 2042888 | 0.9989 | 65.26  | Xinjiang  |
| XJ312217   | LINEAGE3 | 784016  | 0.9983 | 24.91  | Xinjiang  |
| XJ312221   | LINEAGE3 | 1468810 | 0.9971 | 47.23  | Xinjiang  |
| XJ312240   | LINEAGE3 | 2147255 | 0.9978 | 69.37  | Xinjiang  |
| SDSYW6693  | LINEAGE1 | 4577321 | 0.9928 | 93.51  | Shandong  |
| 07DS19453  | LINEAGE1 | 7618472 | 0.9892 | 110.34 | Guangdong |
| SHSYW1603  | LINEAGE1 | 4398325 | 0.9954 | 89.07  | Shanghai  |

**Supplementary Table 4. The source information of 15,319 MTBC genomes representing the global diversity of MTBC.**

| Continent | County       | Source                   | Isolate No. | Reference                                                                                                                                                                                                                                                                                                                              |
|-----------|--------------|--------------------------|-------------|----------------------------------------------------------------------------------------------------------------------------------------------------------------------------------------------------------------------------------------------------------------------------------------------------------------------------------------|
| Asia      | China        | Zhang H. 2013            | 161         | Zhang H, Li D, Zhao L, et al. Genome sequencing of 161 Mycobacterium tuberculosis isolates from China identifies genes and intergenic regions associated with drug resistance. <i>Nature genetics</i> 2013.                                                                                                                            |
| Asia      | China        | Luo T. 2015              | 85          | Luo T, Comas I, Luo D, et al. Southern East Asian origin and coexpansion of Mycobacterium tuberculosis Beijing family with Han Chinese. <i>Proceedings of the National Academy of Sciences of the United States of America</i> 2015; <b>112</b> (26): 8136-41.                                                                         |
| Asia      | China        | Luo T. 2014              | 26          | Luo T, Yang C, Peng Y, et al. Whole-genome sequencing to detect recent transmission of Mycobacterium tuberculosis in settings with a high burden of tuberculosis. <i>Tuberculosis</i> 2014; <b>94</b> (4): 434-40.                                                                                                                     |
| Asia      | Vietnam      | Kathryn EH. 2017         | 1635        | Genomic analysis of Mycobacterium tuberculosis reveals complex etiology of tuberculosis in Vietnam including frequent introduction and transmission of Beijing lineage and positive selection for EsxW Beijing variant.                                                                                                                |
| Asia      | India        | Manson AL. 2017          | 605         | Manson AL, Abeel T, Galagan JE, et al. Mycobacterium tuberculosis Whole Genome Sequences From Southern India Suggest Novel Resistance Mechanisms and the Need for Region-Specific Diagnostics. <i>Clin Infect Dis</i> 2017; <b>64</b> (11): 1494-501.                                                                                  |
| Asia      | Uzbekistan   | Walker TM. 2015          | 531         | Walker TM, Kohl TA, Omar SV, et al. Whole-genome sequencing for prediction of Mycobacterium tuberculosis drug susceptibility and resistance: a retrospective cohort study. <i>The Lancet infectious diseases</i> 2015.                                                                                                                 |
| Asia      | Thailand     | Coker OO.2016            | 3           | Coker OO, Chairasert A, Ngamphiw C, et al. Genetic signatures of Mycobacterium tuberculosis Nonthaburi genotype revealed by whole genome analysis of isolates from tuberculous meningitis patients in Thailand. <i>PeerJ</i> 2016; <b>4</b> : e1905.                                                                                   |
| Asia      | Thailand     | Faksri K. 2016           | 7           | Faksri K, Tan JH, Disratthakrit A, et al. Whole-Genome Sequencing Analysis of Serially Isolated Multi-Drug and Extensively Drug Resistant Mycobacterium tuberculosis from Thai Patients. <i>PLoS one</i> 2016; <b>11</b> (8): e0160992.                                                                                                |
| Asia      | Thailand     | Regmi SM. 2015           | 4           | Regmi SM, Chairasert A, Kulawongnunchai S, et al. Whole genome sequence analysis of multidrug-resistant Mycobacterium tuberculosis Beijing isolates from an outbreak in Thailand. <i>Mol Genet Genomics</i> 2015; <b>290</b> (5): 1933-41.                                                                                             |
| Asia      | Afghan       | Eldholm V. 2016          | 85          | Eldholm V, Petterson JH, Brynildsrud OB, et al. Armed conflict and population displacement as drivers of the evolution and dispersal of Mycobacterium tuberculosis. <i>Proceedings of the National Academy of Sciences of the United States of America</i> 2016.                                                                       |
| Asia      | Myanmar      | Aung HL. 2016            | 14          | Aung HL, Tun T, Moradigaravand D, et al. Whole-genome sequencing of multidrug-resistant Mycobacterium tuberculosis isolates from Myanmar. <i>J Glob Antimicrob Resist</i> 2016; <b>6</b> : 113-7.                                                                                                                                      |
| Asia      | Japan        | Sekizuka. 2015           | 7           | Sekizuka T, Yamashita A, Murase Y, et al. TGS-TB: Total Genotyping Solution for Mycobacterium tuberculosis Using Short-Read Whole-Genome Sequencing. <i>PLoS one</i> 2015; <b>10</b> (11): e0142951.                                                                                                                                   |
| Europe    | Russia       | Casali N. 2014           | 1292        | Casali N, Nikolayevskiy V, Balabanova Y, et al. Evolution and transmission of drug-resistant tuberculosis in a Russian population. <i>Nature genetics</i> 2014; <b>46</b> (3): 279-86.                                                                                                                                                 |
| Europe    | Russia       | Casali N. 2012           | 58          | Casali N, Nikolayevskiy V, Balabanova Y, et al. Microevolution of extensively drug-resistant tuberculosis in Russia. <i>Genome research</i> 2012; <b>22</b> (4): 735-45.                                                                                                                                                               |
| Europe    | UK           | Satta G. 2016            | 16          | Satta G, Witney AA, Shorten RJ, Karlikowska M, Lipman M, McHugh TD. Genetic variation in Mycobacterium tuberculosis isolates from a London outbreak associated with isoniazid resistance. <i>BMC Med</i> 2016; <b>14</b> (1): 117.                                                                                                     |
| Europe    | UK           | Walker TM. 2015          | 1966        | Walker TM, Kohl TA, Omar SV, et al. Whole-genome sequencing for prediction of Mycobacterium tuberculosis drug susceptibility and resistance: a retrospective cohort study. <i>The Lancet infectious diseases</i> 2015.                                                                                                                 |
| Europe    | UK           | Walker TM. 2014          | 364         | Walker TM, Lalor MK, Broda A, et al. Assessment of Mycobacterium tuberculosis transmission in Oxfordshire, UK, 2007-12, with whole pathogen genome sequences: an observational study. <i>The Lancet Respiratory medicine</i> 2014; <b>2</b> (4): 285-92.                                                                               |
| Europe    | UK           | Walker TM. 2013          | 390         | Walker TM, Ip CL, Harrell RH, et al. Whole-genome sequencing to delineate Mycobacterium tuberculosis outbreaks: a retrospective observational study. <i>The Lancet infectious diseases</i> 2013; <b>13</b> (2): 137-46.                                                                                                                |
| Europe    | UK           | Koser CU. 2013           | 1           | Koser CU, Bryant JM, Becq J, et al. Whole-genome sequencing for rapid susceptibility testing of M. tuberculosis. <i>The New England journal of medicine</i> 2013; <b>369</b> (3): 290-2.                                                                                                                                               |
| Europe    | UK           | Torok ME. 2013           | 2           | Torok ME, Reuter S, Bryant J, et al. Rapid whole-genome sequencing for investigation of a suspected tuberculosis outbreak. <i>J Clin Microbiol</i> 2013; <b>51</b> (2): 611-4.                                                                                                                                                         |
| Europe    | UK           | Walker TM. 2017          | 2           | Walker TM, Crook DW, Peto TE, Conlon CP. Whole-genome sequencing identifies nosocomial transmission of extrapulmonary M. tuberculosis. <i>QJM</i> 2016; <b>109</b> (12): 819-20.                                                                                                                                                       |
| Europe    | Netherlands  | Bryant JM. 2013          | 213         | Bryant JM, Schurch AC, van Deutekom H, et al. Inferring patient to patient transmission of Mycobacterium tuberculosis from whole genome sequencing data. <i>BMC Infect Dis</i> 2013; <b>13</b> : 110.                                                                                                                                  |
| Europe    | Netherlands  | Nebenzahl GH. 2016       | 0           | Nebenzahl-Guimaraes H, van Laarhoven A, Farhat MR, et al. Transmissible Mycobacterium tuberculosis Strains Share Genetic Markers and Immune Phenotypes. <i>Am J Respir Crit Care Med</i> 2016.                                                                                                                                         |
| Europe    | Switzerland  | Stucki D. 2015           | 74          | Stucki D, Ballif M, Bodmer T, et al. Tracking a tuberculosis outbreak over 21 years: strain-specific single-nucleotide polymorphism typing combined with targeted whole-genome sequencing. <i>The Journal of infectious diseases</i> 2015; <b>211</b> (8): 1306-16.                                                                    |
| Europe    | Germany      | Kohl TA. 2014            | 58          | Kohl TA, Diel R, Harmsen D, et al. Whole-genome-based Mycobacterium tuberculosis surveillance: a standardized, portable, and expandable approach. <i>J Clin Microbiol</i> 2014; <b>52</b> (7): 2479-86.                                                                                                                                |
| Europe    | Germany      | Walker TM. 2015          | 846         | Walker TM, Kohl TA, Omar SV, et al. Whole-genome sequencing for prediction of Mycobacterium tuberculosis drug susceptibility and resistance: a retrospective cohort study. <i>The Lancet infectious diseases</i> 2015.                                                                                                                 |
| Europe    | Greenland    | Bjorn-Mortensen K. 2016  | 275         | Bjorn-Mortensen K, Soborg B, Koch A, et al. Tracing Mycobacterium tuberculosis transmission by whole genome sequencing in a high incidence setting: a retrospective population-based study in East Greenland. <i>Scientific reports</i> 2016; <b>6</b> : 33180.                                                                        |
| Europe    | Beralus      | Wollenberg KR. 2016      | 598         | Wollenberg KR, Desjardins CA, Zalutskaya A, et al. Whole genome sequencing of Mycobacterium tuberculosis provides insight into the evolution and genetic composition of drug-resistant tuberculosis in Belarus. <i>J Clin Microbiol</i> 2016.                                                                                          |
| Europe    | Portugal     | Phelan J. 2016           | 11          | Phelan J, O'Sullivan DM, Machado D, et al. The variability and reproducibility of whole genome sequencing technology for detecting resistance to anti-tuberculous drugs. <i>Genome Med</i> 2016; <b>8</b> (1): 132.                                                                                                                    |
| Europe    | Portugal     | Perdigao J. 2014         | 84          | Perdigao J, Silva H, Machado D, et al. Unraveling Mycobacterium tuberculosis genomic diversity and evolution in Lisbon, Portugal, a highly drug resistant setting. <i>BMC Genomics</i> 2014; <b>15</b> : 991.                                                                                                                          |
| Europe    | Finland      | Korhonen V. 2016         | 18          | Korhonen V, Smit PW, Haanpera M, et al. Whole genome analysis of Mycobacterium tuberculosis isolates from recurrent episodes of tuberculosis, Finland, 1995-2013. <i>Clin Microbiol Infect</i> 2016; <b>22</b> (6): 549-54.                                                                                                            |
| Africa    | Malawi       | Suerra-Assuncao JA. 2015 | 2267        | Guerra-Assuncao JA, Crampin AC, Houben RM, et al. Large-scale whole genome sequencing of M. tuberculosis provides insights into transmission in a high prevalence area. <i>eLife</i> 2015; <b>4</b> .                                                                                                                                  |
| Africa    | Malawi       | Suerra-Assuncao JA. 2015 | 353         | Guerra-Assuncao JA, Houben RM, Crampin AC, et al. Recurrence due to relapse or reinfection with Mycobacterium tuberculosis: a whole-genome sequencing approach in a large, population-based cohort with a high HIV infection prevalence and active follow-up. <i>The Journal of infectious diseases</i> 2015; <b>211</b> (7): 1154-63. |
| Africa    | South Africa | Black PA. 2015           | 14          | Black PA, de Vos M, Louw GE, et al. Whole genome sequencing reveals genomic heterogeneity and antibiotic purification in Mycobacterium tuberculosis isolates. <i>BMC Genomics</i> 2015; <b>16</b> : 857.                                                                                                                               |



|           |              |                    |     |                                                                                                                                                                                                                                                                                                   |
|-----------|--------------|--------------------|-----|---------------------------------------------------------------------------------------------------------------------------------------------------------------------------------------------------------------------------------------------------------------------------------------------------|
| Africa    | South Africa | Witney AA. 2017    | 36  | Witney AA, Bateson AL, Jindani A, et al. Use of whole-genome sequencing to distinguish relapse from reinfection in a completed tuberculosis clinical trial. <i>BMC Med</i> 2017; <b>15</b> (1): 71.                                                                                               |
| Africa    | South Africa | Walker TM. 2015    | 504 | Walker TM, Kohl TA, Omar SV, et al. Whole-genome sequencing for prediction of Mycobacterium tuberculosis drug susceptibility and resistance: a retrospective cohort study. <i>The Lancet infectious diseases</i> 2015.                                                                            |
| Africa    | South Africa | Cohen KA. 2015     | 473 | Cohen KA, Abeel T, Manson McGuire A, et al. Evolution of Extensively Drug-Resistant Tuberculosis over Four Decades: Whole Genome Sequencing and Dating Analysis of Mycobacterium tuberculosis Isolates from KwaZulu-Natal. <i>PLoS Med</i> 2015; <b>12</b> (9): e1001880.                         |
| Africa    | Mali         | Winglee K. 2016    | 356 | Winglee K, Manson McGuire A, Maiga M, et al. Whole Genome Sequencing of Mycobacterium africanum Strains from Mali Provides Insights into the Mechanisms of Geographic Restriction. <i>PLoS Negl Trop Dis</i> 2016; <b>10</b> (1): e0004332.                                                       |
| Africa    | Siera Lion   | Walker TM. 2015    | 79  | Walker TM, Kohl TA, Omar SV, et al. Whole-genome sequencing for prediction of Mycobacterium tuberculosis drug susceptibility and resistance: a retrospective cohort study. <i>The Lancet infectious diseases</i> 2015.                                                                            |
| Africa    | Djibouti     | Blouin Y. 2012     | 38  | Blouin Y, Hauck Y, Soler C, et al. Significance of the identification in the Horn of Africa of an exceptionally deep branching Mycobacterium tuberculosis clade. <i>PLoS one</i> 2012; <b>7</b> (12): e52841.                                                                                     |
| Africa    | Uganda       | Clark TG. 2013     | 51  | Clark TG, Mallard K, Coll F, et al. Elucidating emergence and transmission of multidrug-resistant tuberculosis in treatment experienced patients by whole genome sequencing. <i>PLoS one</i> 2013; <b>8</b> (12): e83012.                                                                         |
| Africa    | Ethiopia     | Comas I. 2015      | 66  | Comas I, Hailu E, Kiros T, et al. Population Genomics of Mycobacterium tuberculosis in Ethiopia Contradicts the Virgin Soil Hypothesis for Human Tuberculosis in Sub-Saharan Africa. <i>Curr Biol</i> 2015; <b>25</b> (24): 3260-6.                                                               |
| America   | America      | Shea J. 2017       | 608 | Shea J, Halse TA, Lapiere P, et al. Comprehensive Whole-Genome Sequencing and Reporting of Drug Resistance Profiles on Clinical Cases of Mycobacterium tuberculosis in New York State. <i>J Clin Microbiol</i> 2017; <b>55</b> (6): 1871-82.                                                      |
| America   | America      | Brown TS. 2016     | 34  | Brown TS, Narechania A, Walker JR, et al. Genomic epidemiology of Lineage 4 Mycobacterium tuberculosis subpopulations in New York City and New Jersey, 1999-2009. <i>BMC Genomics</i> 2016; <b>17</b> (1): 947.                                                                                   |
| America   | Canada       | Lee RS. 2015       | 169 | Lee RS, Radomski N, Proulx JF, et al. Population genomics of Mycobacterium tuberculosis in the Inuit. <i>Proceedings of the National Academy of Sciences of the United States of America</i> 2015; <b>112</b> (44): 13609-14.                                                                     |
| America   | Canada       | Mehaffy C. 2014    | 60  | Mehaffy C, Guthrie JL, Alexander DC, Stuart R, Rea E, Jamieson FB. Marked microevolution of a unique Mycobacterium tuberculosis strain in 17 years of ongoing transmission in a high risk population. <i>PLoS one</i> 2014; <b>9</b> (11): e112928.                                               |
| America   | Canada       | Gardy JL. 2011     | 36  | Gardy JL, Johnston JC, Ho Sui SJ, et al. Whole-genome sequencing and social-network analysis of a tuberculosis outbreak. <i>The New England journal of medicine</i> 2011; <b>364</b> (8): 730-9.                                                                                                  |
| America   | Haiti        | Ocheretina O. 2015 | 7   | Ocheretina O, Shen L, Escuyer VE, et al. Whole Genome Sequencing Investigation of a Tuberculosis Outbreak in Port-au-Prince, Haiti Caused by a Strain with a "Low-Level" rpoB Mutation L511P - Insights into a Mechanism of Resistance Escalation. <i>PLoS one</i> 2015; <b>10</b> (6): e0129207. |
| America   | Guatemala    | Saelens JW. 2015   | 6   | Saelens JW, Lau-Bonilla D, Moller A, et al. Whole genome sequencing identifies circulating Beijing-lineage Mycobacterium tuberculosis strains in Guatemala and an associated urban outbreak. <i>Tuberculosis</i> 2015; <b>95</b> (6): 810-6.                                                      |
| Australia | Multiple     | Gurjav U. 2016     | 30  | Gurjav U, Outhred AC, Jelfs P, et al. Whole Genome Sequencing Demonstrates Limited Transmission within Identified Mycobacterium tuberculosis Clusters in New South Wales, Australia. <i>PLoS one</i> 2016; <b>11</b> (10): e0163612.                                                              |
| Multiple  | Multiple     | Comas I. 2013      | 171 | Comas I, Coscolla M, Luo T, et al. Out-of-Africa migration and Neolithic coexpansion of Mycobacterium tuberculosis with modern humans. <i>Nature genetics</i> 2013; <b>45</b> (10): 1176-82.                                                                                                      |
| Multiple  | Multiple     | Phelan J. 2016     | 127 | Phelan J, Coll F, McNerney R, et al. Mycobacterium tuberculosis whole genome sequencing and protein structure modelling provides insights into anti-tuberculosis drug resistance. <i>BMC Med</i> 2016; <b>14</b> : 31.                                                                            |
| Multiple  | Multiple     | Pankhurst LJ. 2016 | 356 | Pankhurst LJ, Del Ojo Elias C, Votintseva AA, et al. Rapid, comprehensive, and affordable mycobacterial diagnosis with whole-genome sequencing: a prospective study. <i>The Lancet Respiratory medicine</i> 2016; <b>4</b> (1): 49-58.                                                            |
| Multiple  | Multiple     | Bryant JM. 2013    | 47  | Bryant JM, Harris SR, Parkhill J, et al. Whole-genome sequencing to establish relapse or re-infection with Mycobacterium tuberculosis: a retrospective observational study. <i>The Lancet Respiratory medicine</i> 2013; <b>1</b> (10): 786-92.                                                   |

**Supplementary Table 5. Comparison of cluster rates between sublineages using different sets of VNTR loci.**

**VNTR-9 loci**

|      | GX         | HLJ         | HN          | SC         | SD          | SH           | All Sites    | OR [95%CI]          | P value |
|------|------------|-------------|-------------|------------|-------------|--------------|--------------|---------------------|---------|
| L2.3 | 47%(27/58) | 60%(87/146) | 48%(62/130) | 46%(30/65) | 62%(83/134) | 61%(142/233) | 56%(431/766) | 1                   | -       |
| L2.2 | 31%(15/49) | 25%(3/12)   | 39%(17/44)  | 19%(9/47)  | 16%(4/25)   | 35%(28/80)   | 30%(76/257)  | 0.326 [0.238-0.446] | <0.0001 |
| L4.2 | 31%(5/16)  | #DIV/0!     | 22%(2/9)    | 24%(4/17)  | 0%(0/5)     | 27%(6/22)    | 25%(17/69)   | 0.254 [0.135-0.457] | <0.0001 |
| L4.4 | 24%(8/34)  | 60%(6/10)   | 0%(0/3)     | 18%(6/33)  | 12%(2/17)   | 8%(2/24)     | 20%(24/121)  | 0.192 [0.115-0.312] | <0.0001 |
| L4.5 | 27%(4/15)  | 0%(0/15)    | 0%(0/8)     | 34%(15/44) | 26%(5/19)   | 8%(2/25)     | 21%(26/126)  | 0.202 [0.123-0.323] | <0.0001 |

**VNTR-9+3 loci**

|      | GX         | HLJ         | HN          | SC        | SD          | SH          | All Sites    | OR [95%CI]          | P value |
|------|------------|-------------|-------------|-----------|-------------|-------------|--------------|---------------------|---------|
| L2.3 | 21%(12/56) | 39%(57/144) | 18%(24/114) | 6%(4/65)  | 20%(27/128) | 34%(80/232) | 28%(204/739) | 1                   | -       |
| L2.2 | 8%(4/48)   | 33%(4/12)   | 23%(10/40)  | 4%(2/47)  | 16%(4/22)   | 25%(20/79)  | 18%(44/248)  | 0.566 [0.384-0.822] | 0.0019  |
| L4.2 | 0%(0/16)   | 0%(0/0)     | 22%(2/9)    | 12%(2/17) | 0%(0/5)     | 36%(8/22)   | 17%(12/69)   | 0.552 [0.264-1.068] | 0.0668  |
| L4.4 | 12%(4/29)  | 50%(5/10)   | 0%(0/3)     | 12%(4/33) | 12%(2/16)   | 8%(2/23)    | 15%(17/114)  | 0.460 [0.251-0.799] | 0.0040  |
| L4.5 | 0%(0/15)   | 0%(0/15)    | 0%(0/8)     | 14%(6/44) | 21%(4/19)   | 8%(2/25)    | 10%(12/126)  | 0.276 [0.136-0.516] | <0.0001 |

**Reference for the VNTR typing schemes:**

Luo, T. et al. Development of a hierarchical variable-number tandem repeat typing scheme for *Mycobacterium tuberculosis* in China. PLoS One 9, e89726 (2014).

Supplementary Table 6. SNP typing results of global MTBC isolates based on whole genome sequences.

|                  | Belarus | Vietnam | Uzbekistan | UK  | Serria Leone | South Africa | Mali | Malawi | Inuit | India | Greenland | Germany | Russia | Ethiopia | China |
|------------------|---------|---------|------------|-----|--------------|--------------|------|--------|-------|-------|-----------|---------|--------|----------|-------|
| lineage1.1       | 0       | 0       | 0          | 0   | 0            | 0            | 0    | 0      | 0     | 0     | 0         | 0       | 0      | 0        | 0     |
| lineage1.1.1     | 0       | 46      | 0          | 1   | 3            | 0            | 3    | 0      | 0     | 0     | 0         | 5       | 2      | 3        | 0     |
| lineage1.1.1.1   | 0       | 318     | 0          | 3   | 0            | 0            | 0    | 73     | 0     | 0     | 0         | 8       | 1      | 0        | 0     |
| lineage1.1.2     | 0       | 0       | 0          | 111 | 0            | 0            | 0    | 182    | 0     | 238   | 0         | 12      | 2      | 0        | 0     |
| lineage1.1.3     | 0       | 0       | 0          | 42  | 0            | 1            | 0    | 0      | 0     | 12    | 0         | 4       | 1      | 0        | 0     |
| lineage1.2.1     | 0       | 23      | 0          | 44  | 0            | 0            | 0    | 98     | 0     | 6     | 0         | 18      | 0      | 0        | 1     |
| lineage1.2.2     | 0       | 0       | 0          | 59  | 0            | 8            | 0    | 0      | 0     | 62    | 0         | 3       | 0      | 0        | 0     |
| lineage2.1       | 0       | 58      | 0          | 0   | 0            | 0            | 0    | 0      | 0     | 0     | 0         | 2       | 0      | 0        | 16    |
| lineage2.2       | 0       | 0       | 0          | 0   | 0            | 0            | 0    | 108    | 0     | 0     | 0         | 0       | 0      | 0        | 0     |
| lineage2.2.1     | 373     | 795     | 446        | 104 | 2            | 87           | 5    | 0      | 0     | 47    | 0         | 56      | 738    | 2        | 892   |
| lineage2.2.1.1   | 0       | 155     | 0          | 11  | 0            | 9            | 0    | 0      | 0     | 8     | 0         | 4       | 1      | 0        | 72    |
| lineage2.2.1.2   | 0       | 5       | 0          | 0   | 0            | 0            | 0    | 0      | 1     | 4     | 0         | 0       | 1      | 0        | 0     |
| lineage2.2.2     | 0       | 39      | 0          | 4   | 0            | 4            | 0    | 201    | 0     | 0     | 0         | 3       | 1      | 0        | 53    |
| lineage3.1.1     | 0       | 0       | 0          | 108 | 0            | 9            | 0    | 5      | 0     | 0     | 0         | 5       | 1      | 0        | 0     |
| lineage3.1.2     | 0       | 0       | 0          | 41  | 0            | 0            | 0    | 0      | 0     | 21    | 0         | 3       | 0      | 0        | 0     |
| lineage3.1.2.1   | 0       | 0       | 0          | 26  | 0            | 0            | 0    | 0      | 0     | 18    | 0         | 2       | 0      | 0        | 0     |
| lineage3.1.2.2   | 0       | 0       | 0          | 17  | 0            | 0            | 0    | 1      | 0     | 0     | 0         | 0       | 0      | 0        | 0     |
| lineage4.1       | 4       | 0       | 0          | 10  | 10           | 5            | 169  | 0      | 0     | 0     | 0         | 12      | 17     | 10       | 0     |
| lineage4.1.1     | 0       | 0       | 0          | 2   | 0            | 10           | 0    | 2      | 0     | 0     | 0         | 1       | 0      | 0        | 0     |
| lineage4.1.1.1   | 0       | 0       | 0          | 70  | 1            | 14           | 0    | 0      | 0     | 2     | 0         | 3       | 0      | 1        | 0     |
| lineage4.1.1.2   | 0       | 0       | 0          | 1   | 0            | 3            | 0    | 55     | 1     | 0     | 0         | 1       | 0      | 0        | 0     |
| lineage4.1.1.3   | 0       | 0       | 0          | 153 | 4            | 40           | 3    | 82     | 0     | 2     | 0         | 4       | 0      | 4        | 1     |
| lineage4.1.2     | 0       | 15      | 0          | 16  | 0            | 16           | 4    | 24     | 154   | 0     | 0         | 23      | 28     | 0        | 0     |
| lineage4.1.2.1   | 26      | 42      | 11         | 86  | 10           | 33           | 20   | 0      | 0     | 4     | 0         | 205     | 44     | 10       | 0     |
| lineage4.2       | 1       | 0       | 0          | 0   | 0            | 0            | 0    | 0      | 0     | 0     | 0         | 0       | 2      | 0        | 5     |
| lineage4.2.1     | 35      | 0       | 12         | 5   | 0            | 0            | 0    | 6      | 0     | 0     | 0         | 19      | 108    | 0        | 1     |
| lineage4.2.2     | 0       | 31      | 0          | 46  | 0            | 1            | 0    | 0      | 0     | 0     | 0         | 9       | 0      | 0        | 26    |
| lineage4.2.2.1   | 0       | 1       | 0          | 1   | 0            | 0            | 0    | 10     | 0     | 0     | 0         | 24      | 0      | 0        | 0     |
| lineage4.3       | 53      | 1       | 3          | 12  | 1            | 2            | 2    | 0      | 0     | 0     | 0         | 4       | 3      | 1        | 0     |
| lineage4.3.1     | 0       | 2       | 0          | 9   | 0            | 0            | 1    | 0      | 0     | 0     | 0         | 8       | 0      | 0        | 0     |
| lineage4.3.2     | 0       | 1       | 0          | 5   | 0            | 16           | 0    | 12     | 0     | 0     | 0         | 5       | 0      | 0        | 0     |
| lineage4.3.2.1   | 0       | 0       | 0          | 6   | 0            | 63           | 0    | 36     | 0     | 0     | 0         | 1       | 0      | 0        | 0     |
| lineage4.3.3     | 54      | 3       | 19         | 25  | 8            | 15           | 0    | 0      | 0     | 0     | 1         | 24      | 88     | 8        | 0     |
| lineage4.3.4     | 0       | 0       | 0          | 3   | 0            | 6            | 0    | 82     | 0     | 0     | 0         | 0       | 0      | 0        | 0     |
| lineage4.3.4.1   | 0       | 0       | 0          | 13  | 0            | 3            | 0    | 15     | 0     | 0     | 0         | 11      | 4      | 0        | 1     |
| lineage4.3.4.2   | 0       | 0       | 0          | 10  | 3            | 11           | 0    | 952    | 0     | 0     | 0         | 10      | 4      | 3        | 0     |
| lineage4.3.4.2.1 | 0       | 0       | 0          | 27  | 0            | 23           | 0    | 0      | 0     | 0     | 0         | 1       | 0      | 0        | 0     |
| lineage4.4       | 0       | 0       | 0          | 5   | 0            | 0            | 0    | 0      | 0     | 0     | 0         | 1       | 0      | 0        | 0     |
| lineage4.4.1     | 0       | 0       | 0          | 1   | 0            | 3            | 0    | 27     | 0     | 0     | 2         | 0       | 0      | 0        | 0     |
| lineage4.4.1.1   | 0       | 4       | 4          | 16  | 1            | 43           | 0    | 11     | 0     | 2     | 27        | 18      | 5      | 1        | 0     |
| lineage4.4.1.2   | 0       | 4       | 0          | 7   | 0            | 0            | 0    | 0      | 0     | 0     | 0         | 2       | 0      | 0        | 1     |
| lineage4.4.2     | 0       | 35      | 0          | 7   | 0            | 1            | 0    | 0      | 0     | 0     | 0         | 4       | 0      | 0        | 101   |
| lineage4.5       | 0       | 33      | 2          | 41  | 0            | 0            | 0    | 0      | 0     | 0     | 0         | 26      | 1      | 0        | 160   |
| lineage4.6       | 0       | 0       | 0          | 0   | 0            | 0            | 0    | 0      | 0     | 0     | 0         | 0       | 0      | 0        | 0     |
| lineage4.6.1     | 0       | 0       | 0          | 2   | 0            | 0            | 0    | 15     | 0     | 0     | 0         | 0       | 0      | 0        | 0     |
| lineage4.6.1.1   | 0       | 0       | 0          | 4   | 0            | 1            | 0    | 13     | 0     | 0     | 0         | 3       | 0      | 0        | 0     |
| lineage4.6.1.2   | 0       | 0       | 0          | 7   | 0            | 0            | 0    | 1      | 0     | 0     | 0         | 1       | 0      | 0        | 0     |

|                 |     |      |     |      |    |     |     |      |     |     |     |     |      |    |      |
|-----------------|-----|------|-----|------|----|-----|-----|------|-----|-----|-----|-----|------|----|------|
| lineage4.6.2    | 0   | 0    | 0   | 6    | 0  | 0   | 0   | 1    | 0   | 0   | 0   | 2   | 0    | 0  | 0    |
| lineage4.6.2.1  | 0   | 0    | 0   | 3    | 0  | 0   | 0   | 3    | 0   | 0   | 0   | 0   | 0    | 0  | 0    |
| lineage4.6.2.2  | 0   | 3    | 0   | 23   | 3  | 0   | 23  | 10   | 0   | 0   | 0   | 26  | 1    | 3  | 0    |
| lineage4.7      | 8   | 1    | 0   | 10   | 0  | 5   | 4   | 42   | 0   | 0   | 0   | 34  | 3    | 0  | 0    |
| lineage4.8      | 32  | 16   | 22  | 166  | 11 | 27  | 0   | 0    | 11  | 2   | 231 | 145 | 102  | 11 | 2    |
| lineage4.9      | 0   | 0    | 0   | 0    | 0  | 0   | 0   | 0    | 0   | 0   | 0   | 0   | 0    | 0  | 0    |
| LINEAGEBOV      | 0   | 0    | 0   | 0    | 0  | 0   | 0   | 0    | 0   | 0   | 0   | 0   | 0    | 0  | 0    |
| LINEAGEBOV_AFRI | 0   | 0    | 0   | 0    | 18 | 0   | 0   | 0    | 0   | 0   | 0   | 0   | 0    | 18 | 0    |
| All             | 586 | 1631 | 519 | 1369 | 75 | 459 | 234 | 2067 | 167 | 428 | 261 | 752 | 1158 | 75 | 1332 |

**Supplementary Table 7. Primer and probe sequences for SNP genotyping**

| Probe/Primer | SNP         | Probe/Primer sequence      | 5'-label | 3'-label |
|--------------|-------------|----------------------------|----------|----------|
| Probe_L45    | 2789341 A-C | TGCCAGCGATCTTAGATTC        | FAM      | BQ1      |
| F_L45        |             | GTCCTTTGGCGCTAGAGCTT       |          |          |
| R_L45        |             | GAAGGCGGCTACAAAGAAGG       |          |          |
| Probe_L44    | 3966059 G-C | TGCCACCGTACCCAGCG          | ROX      | BQ2      |
| F_L44        |             | GACGGTTGTCATTGCCTGT        |          |          |
| R_L44        |             | CGTGGACTACCACGACTTGA       |          |          |
| Probe_L42    | 2181026 G-C | CACATCGCAGCAGACGGGCACGACCT | FAM      | BQ1      |
| F_L42        |             | ATCCAACATGCTGGTCACCT       |          |          |
| R_L42        |             | AGAGAAGTTGGCGGATGAGA       |          |          |
| Probe_L22    | 2752122 C-G | CTGGTGACGTGGTCACCAAC       | FAM      | BQ1      |
| F_L22        |             | TCAAAGCCCACGGCATCC         |          |          |
| R_L22        |             | AACGTTGAAGAACGCCCGTA       |          |          |
| Probe_L23    | 1286766 G-C | AAGAACTGGGACTCGAGGT        | ROX      | BQ2      |
| F_L23        |             | CGGTAAGGTCGCCGCC           |          |          |
| R_L23        |             | TTCAACGCAATATCGTCGCC       |          |          |
| Probe-L2-L4  | 2752122 G-C | CTGGTGACGTGGTCACCAAC       | FAM      | BQ1      |
| F-L2-L4      |             | TCAAAGCCCACGGCATCC         |          |          |
| R-L2-L4      |             | AACGTTGAAGAACGCCCGTA       |          |          |

## Supplementary Discussion

Reconstructions of the global migratory history of the MTBC indicate that the pathogen spread *via* diverse human movements within the past several thousand years<sup>1</sup>. One might expect that the Chinese epidemic arose in the context of continuous introductions of new MTBC genotypes as the pandemic bloomed. However, although we identified more than ten different MTBC lineages/sublineages in our sample of 4,578 isolates, the population was dominated by the four indigenous genotypes that made up ~99.0% of the Chinese population of MTBC. In a previous analysis of the global population, relative rates of migration to and from East Asia were low<sup>1</sup>. Together with the results presented here, this suggests that distinct historical phenomena shaped the spread of TB in China. We did not observe the expansion of any indigenous or foreign strains during the last century, contradicting the assumption that the current TB epidemic in China is due to re-emergence of native or introduced populations of pathogens. On the contrary, we inferred a precipitous decline of  $N_e$  in MTBC population in the second half of the last century.

Descriptions of TB in Chinese historical texts predate the oldest introduction that we inferred for extant MTBC in China. This inconsistency could result from several scenarios: similarity in the clinical presentation of TB and other diseases, and/or clinical TB arising from a population of bacteria that are distinct from currently extant MTBC. A similar situation has been observed in the Americas, where the current population of MTBC clearly derives from European colonial migrations, but an abundance of morphological and DNA evidence indicated pre-Columbian TB<sup>2,3</sup>. The recent discovery of 1,000-year-old MTBC genomes from Peruvian human skeletons suggests that pre-Columbian TB in this region could have been caused by *M. pinnipedii*<sup>4</sup>. Ancient MTBC genomes from China would similarly clarify the early history of TB in this country.

*Substitution rate model: MTBC-6 vs. MTBC-70* The substitution/mutation rate of MTBC has been debated many times<sup>4-10</sup>. There are two competing substitution rate models for MTBC. One is MTBC-70, which is based on the “out of Africa” hypothesis and assumption of codivergence between MTBC and its human host<sup>6</sup>; the other is MTBC-6, which was calibrated by ancient MTBC DNA in two studies<sup>4,5</sup>. In this study, we used the MTBC-6 model for dating because 1) the substitution rate of MTBC-6 model was calibrated by ancient MTBC DNA and a preponderance of recent literature favors this model<sup>1,11-13</sup>; 2) results from MTBC-6 model fit well with multiple aspects of the demographic history of China, e.g., the dispersal of L4.5 *via* the overland Silk Road, the synchronous growth of MTBC and human population, the decrease of MTBC  $N_e$  in the second half of last century. Evaluating the plausibility of the two

competing models is not the goal of this project and our major findings are independent of the model we chose, as both models point to historical origins and expansions determining the current TB epidemic in China. Formal consensus on dating and correlations between TB history and historical events will probably have to wait for the analysis of more samples from ancient MTBC DNA to emerge<sup>14</sup>.

1. O'Neill, M.B. *et al.* Lineage specific histories of Mycobacterium tuberculosis dispersal in Africa and Eurasia. *bioRxiv* (2017).
2. Salo, W.L., Aufderheide, A.C., Buikstra, J. & Holcomb, T.A. Identification of Mycobacterium tuberculosis DNA in a pre-Columbian Peruvian mummy. *Proceedings of the National Academy of Sciences* **91**, 2091-2094 (1994).
3. Roberts, C.A. & Buikstra, J.E. *The bioarchaeology of tuberculosis: a global perspective on a re-emerging disease*, (University Press of Florida, 2003).
4. Bos, K.I. *et al.* Pre-Columbian mycobacterial genomes reveal seals as a source of New World human tuberculosis. *Nature* **514**, 494-7 (2014).
5. Kay, G.L. *et al.* Eighteenth-century genomes show that mixed infections were common at time of peak tuberculosis in Europe. *Nat Commun* **6**, 6717 (2015).
6. Comas, I. *et al.* Out-of-Africa migration and Neolithic coexpansion of Mycobacterium tuberculosis with modern humans. *Nat Genet* **45**, 1176-82 (2013).
7. Merker, M. *et al.* Evolutionary history and global spread of the Mycobacterium tuberculosis Beijing lineage. *Nat Genet* **47**, 242-9 (2015).
8. Ford, C.B. *et al.* Use of whole genome sequencing to estimate the mutation rate of Mycobacterium tuberculosis during latent infection. *Nat Genet* **43**, 482-6 (2011).
9. Ford, C.B. *et al.* Mycobacterium tuberculosis mutation rate estimates from different lineages predict substantial differences in the emergence of drug-resistant tuberculosis. *Nat Genet* **45**, 784-90 (2013).
10. Eldholm, V. *et al.* Armed conflict and population displacement as drivers of the evolution and dispersal of Mycobacterium tuberculosis. *Proc Natl Acad Sci U S A* **113**, 13881-13886 (2016).
11. Comas, I. *et al.* Population Genomics of Mycobacterium tuberculosis in Ethiopia Contradicts the Virgin Soil Hypothesis for Human Tuberculosis in Sub-Saharan Africa. *Curr Biol* **25**, 3260-6 (2015).
12. Mokrousov, I. *et al.* Emerging peak on the phylogeographic landscape of Mycobacterium tuberculosis in West Asia: Definitely smoke, likely fire. *Mol Phylogenet Evol* **116**, 202-212 (2017).
13. Eldholm, V. *et al.* Armed conflict and population displacement as drivers of the evolution and dispersal of Mycobacterium tuberculosis. *Proc Natl Acad Sci U S A* (2016).
14. Rood, J. Tracking Tuberculosis Over Time. (The Scientist, 2015).
